# Supplementary material for: The distribution of different intensity demanding scenarios in elite rink hockey players using an electronic performance tracking system
Source: PLoS One. 2023 Mar 9;18(3):e0282788. doi: 10.1371/journal.pone.0282788 (PMC9997928; doi:10.1371/journal.pone.0282788)
Supplement: S1 File — (XLSX) [file pone.0282788.s001.xlsx]

## Sheet: Sheet2
individual_percent_cat	position	athlete_code	variable	n
(10,20]	exterior	A	Acc Abs_mes_count_n_2	15
(10,20]	exterior	A	Acc Abs_mes_count_n_2	25
(10,20]	exterior	A	Acc Abs_mes_count_n_2	14
(10,20]	exterior	A	Acc Abs_mes_count_n_2	7
(10,20]	exterior	A	Acc Abs_mes_count_n_2	8
(10,20]	exterior	A	Acc Abs_mes_count_n_2	10
(10,20]	exterior	A	Acc Abs_mes_count_n_2	11
(10,20]	exterior	A	Acc Abs_mes_count_n_2	8
(10,20]	exterior	A	Acc Abs_mes_count_n_2	5
(10,20]	exterior	A	Acc Abs_mes_count_n_2	11
(10,20]	exterior	A	Acc Abs_mes_count_n_2	9
(10,20]	exterior	A	Acc Abs_mes_count_n_2	13
(10,20]	exterior	A	Acc Abs_mes_count_n_2	11
(10,20]	exterior	A	Acc Abs_mes_count_n_2	12
(10,20]	exterior	A	Acc Abs_mes_count_n_2	18
(10,20]	exterior	A	Acc Abs_mes_count_n_2	16
(10,20]	exterior	A	Acc Abs_mes_count_n_2	18
(10,20]	exterior	A	Acc Abs_mes_count_n_2	13
(20,30]	exterior	A	Acc Abs_mes_count_n_2	12
(20,30]	exterior	A	Acc Abs_mes_count_n_2	14
(20,30]	exterior	A	Acc Abs_mes_count_n_2	13
(20,30]	exterior	A	Acc Abs_mes_count_n_2	14
(20,30]	exterior	A	Acc Abs_mes_count_n_2	13
(20,30]	exterior	A	Acc Abs_mes_count_n_2	7
(20,30]	exterior	A	Acc Abs_mes_count_n_2	3
(20,30]	exterior	A	Acc Abs_mes_count_n_2	8
(20,30]	exterior	A	Acc Abs_mes_count_n_2	8
(20,30]	exterior	A	Acc Abs_mes_count_n_2	10
(20,30]	exterior	A	Acc Abs_mes_count_n_2	9
(20,30]	exterior	A	Acc Abs_mes_count_n_2	16
(20,30]	exterior	A	Acc Abs_mes_count_n_2	9
(20,30]	exterior	A	Acc Abs_mes_count_n_2	9
(20,30]	exterior	A	Acc Abs_mes_count_n_2	11
(20,30]	exterior	A	Acc Abs_mes_count_n_2	13
(20,30]	exterior	A	Acc Abs_mes_count_n_2	19
(20,30]	exterior	A	Acc Abs_mes_count_n_2	12
(40,50]	exterior	A	Acc Abs_mes_count_n_2	12
(40,50]	exterior	A	Acc Abs_mes_count_n_2	16
(40,50]	exterior	A	Acc Abs_mes_count_n_2	15
(40,50]	exterior	A	Acc Abs_mes_count_n_2	16
(40,50]	exterior	A	Acc Abs_mes_count_n_2	9
(40,50]	exterior	A	Acc Abs_mes_count_n_2	14
(40,50]	exterior	A	Acc Abs_mes_count_n_2	8
(40,50]	exterior	A	Acc Abs_mes_count_n_2	10
(40,50]	exterior	A	Acc Abs_mes_count_n_2	9
(40,50]	exterior	A	Acc Abs_mes_count_n_2	6
(40,50]	exterior	A	Acc Abs_mes_count_n_2	10
(40,50]	exterior	A	Acc Abs_mes_count_n_2	11
(40,50]	exterior	A	Acc Abs_mes_count_n_2	13
(40,50]	exterior	A	Acc Abs_mes_count_n_2	8
(40,50]	exterior	A	Acc Abs_mes_count_n_2	17
(40,50]	exterior	A	Acc Abs_mes_count_n_2	14
(40,50]	exterior	A	Acc Abs_mes_count_n_2	8
(40,50]	exterior	A	Acc Abs_mes_count_n_2	9
(50,60]	exterior	A	Acc Abs_mes_count_n_2	7
(50,60]	exterior	A	Acc Abs_mes_count_n_2	15
(50,60]	exterior	A	Acc Abs_mes_count_n_2	12
(50,60]	exterior	A	Acc Abs_mes_count_n_2	10
(50,60]	exterior	A	Acc Abs_mes_count_n_2	8
(50,60]	exterior	A	Acc Abs_mes_count_n_2	9
(50,60]	exterior	A	Acc Abs_mes_count_n_2	7
(50,60]	exterior	A	Acc Abs_mes_count_n_2	7
(50,60]	exterior	A	Acc Abs_mes_count_n_2	13
(50,60]	exterior	A	Acc Abs_mes_count_n_2	8
(50,60]	exterior	A	Acc Abs_mes_count_n_2	8
(50,60]	exterior	A	Acc Abs_mes_count_n_2	7
(50,60]	exterior	A	Acc Abs_mes_count_n_2	3
(50,60]	exterior	A	Acc Abs_mes_count_n_2	7
(50,60]	exterior	A	Acc Abs_mes_count_n_2	7
(50,60]	exterior	A	Acc Abs_mes_count_n_2	8
(50,60]	exterior	A	Acc Abs_mes_count_n_2	12
(50,60]	exterior	A	Acc Abs_mes_count_n_2	2
(70,80]	exterior	A	Acc Abs_mes_count_n_2	8
(70,80]	exterior	A	Acc Abs_mes_count_n_2	4
(70,80]	exterior	A	Acc Abs_mes_count_n_2	1
(70,80]	exterior	A	Acc Abs_mes_count_n_2	5
(70,80]	exterior	A	Acc Abs_mes_count_n_2	4
(70,80]	exterior	A	Acc Abs_mes_count_n_2	5
(70,80]	exterior	A	Acc Abs_mes_count_n_2	2
(70,80]	exterior	A	Acc Abs_mes_count_n_2	4
(70,80]	exterior	A	Acc Abs_mes_count_n_2	8
(70,80]	exterior	A	Acc Abs_mes_count_n_2	6
(70,80]	exterior	A	Acc Abs_mes_count_n_2	8
(70,80]	exterior	A	Acc Abs_mes_count_n_2	3
(70,80]	exterior	A	Acc Abs_mes_count_n_2	4
(70,80]	exterior	A	Acc Abs_mes_count_n_2	2
(70,80]	exterior	A	Acc Abs_mes_count_n_2	3
(70,80]	exterior	A	Acc Abs_mes_count_n_2	2
(70,80]	exterior	A	Acc Abs_mes_count_n_2	6
(70,80]	exterior	A	Acc Abs_mes_count_n_2	5
(80,90]	exterior	A	Acc Abs_mes_count_n_2	1
(80,90]	exterior	A	Acc Abs_mes_count_n_2	1
(80,90]	exterior	A	Acc Abs_mes_count_n_2	1
(80,90]	exterior	A	Acc Abs_mes_count_n_2	2
(80,90]	exterior	A	Acc Abs_mes_count_n_2	1
(80,90]	exterior	A	Acc Abs_mes_count_n_2	1
(80,90]	exterior	A	Acc Abs_mes_count_n_2	1
(80,90]	exterior	A	Acc Abs_mes_count_n_2	1
(80,90]	exterior	A	Acc Abs_mes_count_n_2	2
(80,90]	exterior	A	Acc Abs_mes_count_n_2	2
(80,90]	exterior	A	Acc Abs_mes_count_n_2	2
(80,90]	exterior	A	Acc Abs_mes_count_n_2	2
(100,110]	exterior	A	Acc Abs_mes_count_n_2	2
(100,110]	exterior	A	Acc Abs_mes_count_n_2	1
(10,20]	exterior	B	Acc Abs_mes_count_n_2	9
(10,20]	exterior	B	Acc Abs_mes_count_n_2	15
(10,20]	exterior	B	Acc Abs_mes_count_n_2	12
(10,20]	exterior	B	Acc Abs_mes_count_n_2	12
(10,20]	exterior	B	Acc Abs_mes_count_n_2	10
(10,20]	exterior	B	Acc Abs_mes_count_n_2	11
(10,20]	exterior	B	Acc Abs_mes_count_n_2	12
(10,20]	exterior	B	Acc Abs_mes_count_n_2	13
(10,20]	exterior	B	Acc Abs_mes_count_n_2	5
(10,20]	exterior	B	Acc Abs_mes_count_n_2	9
(10,20]	exterior	B	Acc Abs_mes_count_n_2	9
(10,20]	exterior	B	Acc Abs_mes_count_n_2	9
(10,20]	exterior	B	Acc Abs_mes_count_n_2	9
(10,20]	exterior	B	Acc Abs_mes_count_n_2	13
(10,20]	exterior	B	Acc Abs_mes_count_n_2	16
(10,20]	exterior	B	Acc Abs_mes_count_n_2	8
(10,20]	exterior	B	Acc Abs_mes_count_n_2	6
(10,20]	exterior	B	Acc Abs_mes_count_n_2	14
(20,30]	exterior	B	Acc Abs_mes_count_n_2	9
(20,30]	exterior	B	Acc Abs_mes_count_n_2	8
(20,30]	exterior	B	Acc Abs_mes_count_n_2	9
(20,30]	exterior	B	Acc Abs_mes_count_n_2	12
(20,30]	exterior	B	Acc Abs_mes_count_n_2	9
(20,30]	exterior	B	Acc Abs_mes_count_n_2	13
(20,30]	exterior	B	Acc Abs_mes_count_n_2	11
(20,30]	exterior	B	Acc Abs_mes_count_n_2	10
(20,30]	exterior	B	Acc Abs_mes_count_n_2	9
(20,30]	exterior	B	Acc Abs_mes_count_n_2	7
(20,30]	exterior	B	Acc Abs_mes_count_n_2	9
(20,30]	exterior	B	Acc Abs_mes_count_n_2	11
(20,30]	exterior	B	Acc Abs_mes_count_n_2	7
(20,30]	exterior	B	Acc Abs_mes_count_n_2	11
(20,30]	exterior	B	Acc Abs_mes_count_n_2	21
(20,30]	exterior	B	Acc Abs_mes_count_n_2	6
(20,30]	exterior	B	Acc Abs_mes_count_n_2	7
(20,30]	exterior	B	Acc Abs_mes_count_n_2	12
(30,40]	exterior	B	Acc Abs_mes_count_n_2	7
(30,40]	exterior	B	Acc Abs_mes_count_n_2	14
(30,40]	exterior	B	Acc Abs_mes_count_n_2	10
(30,40]	exterior	B	Acc Abs_mes_count_n_2	10
(30,40]	exterior	B	Acc Abs_mes_count_n_2	10
(30,40]	exterior	B	Acc Abs_mes_count_n_2	8
(30,40]	exterior	B	Acc Abs_mes_count_n_2	11
(30,40]	exterior	B	Acc Abs_mes_count_n_2	13
(30,40]	exterior	B	Acc Abs_mes_count_n_2	13
(30,40]	exterior	B	Acc Abs_mes_count_n_2	13
(30,40]	exterior	B	Acc Abs_mes_count_n_2	6
(30,40]	exterior	B	Acc Abs_mes_count_n_2	11
(30,40]	exterior	B	Acc Abs_mes_count_n_2	13
(30,40]	exterior	B	Acc Abs_mes_count_n_2	16
(30,40]	exterior	B	Acc Abs_mes_count_n_2	8
(30,40]	exterior	B	Acc Abs_mes_count_n_2	14
(30,40]	exterior	B	Acc Abs_mes_count_n_2	7
(30,40]	exterior	B	Acc Abs_mes_count_n_2	7
(40,50]	exterior	B	Acc Abs_mes_count_n_2	9
(40,50]	exterior	B	Acc Abs_mes_count_n_2	12
(40,50]	exterior	B	Acc Abs_mes_count_n_2	18
(40,50]	exterior	B	Acc Abs_mes_count_n_2	15
(40,50]	exterior	B	Acc Abs_mes_count_n_2	12
(40,50]	exterior	B	Acc Abs_mes_count_n_2	3
(40,50]	exterior	B	Acc Abs_mes_count_n_2	13
(40,50]	exterior	B	Acc Abs_mes_count_n_2	8
(40,50]	exterior	B	Acc Abs_mes_count_n_2	10
(40,50]	exterior	B	Acc Abs_mes_count_n_2	7
(40,50]	exterior	B	Acc Abs_mes_count_n_2	7
(40,50]	exterior	B	Acc Abs_mes_count_n_2	11
(40,50]	exterior	B	Acc Abs_mes_count_n_2	14
(40,50]	exterior	B	Acc Abs_mes_count_n_2	8
(40,50]	exterior	B	Acc Abs_mes_count_n_2	12
(40,50]	exterior	B	Acc Abs_mes_count_n_2	10
(40,50]	exterior	B	Acc Abs_mes_count_n_2	8
(40,50]	exterior	B	Acc Abs_mes_count_n_2	7
(60,70]	exterior	B	Acc Abs_mes_count_n_2	5
(60,70]	exterior	B	Acc Abs_mes_count_n_2	14
(60,70]	exterior	B	Acc Abs_mes_count_n_2	5
(60,70]	exterior	B	Acc Abs_mes_count_n_2	7
(60,70]	exterior	B	Acc Abs_mes_count_n_2	6
(60,70]	exterior	B	Acc Abs_mes_count_n_2	8
(60,70]	exterior	B	Acc Abs_mes_count_n_2	5
(60,70]	exterior	B	Acc Abs_mes_count_n_2	5
(60,70]	exterior	B	Acc Abs_mes_count_n_2	4
(60,70]	exterior	B	Acc Abs_mes_count_n_2	10
(60,70]	exterior	B	Acc Abs_mes_count_n_2	9
(60,70]	exterior	B	Acc Abs_mes_count_n_2	4
(60,70]	exterior	B	Acc Abs_mes_count_n_2	3
(60,70]	exterior	B	Acc Abs_mes_count_n_2	8
(60,70]	exterior	B	Acc Abs_mes_count_n_2	9
(60,70]	exterior	B	Acc Abs_mes_count_n_2	2
(60,70]	exterior	B	Acc Abs_mes_count_n_2	8
(60,70]	exterior	B	Acc Abs_mes_count_n_2	8
(70,80]	exterior	B	Acc Abs_mes_count_n_2	7
(70,80]	exterior	B	Acc Abs_mes_count_n_2	1
(70,80]	exterior	B	Acc Abs_mes_count_n_2	3
(70,80]	exterior	B	Acc Abs_mes_count_n_2	3
(70,80]	exterior	B	Acc Abs_mes_count_n_2	6
(70,80]	exterior	B	Acc Abs_mes_count_n_2	3
(70,80]	exterior	B	Acc Abs_mes_count_n_2	4
(70,80]	exterior	B	Acc Abs_mes_count_n_2	4
(70,80]	exterior	B	Acc Abs_mes_count_n_2	2
(70,80]	exterior	B	Acc Abs_mes_count_n_2	2
(70,80]	exterior	B	Acc Abs_mes_count_n_2	2
(70,80]	exterior	B	Acc Abs_mes_count_n_2	3
(70,80]	exterior	B	Acc Abs_mes_count_n_2	5
(70,80]	exterior	B	Acc Abs_mes_count_n_2	1
(70,80]	exterior	B	Acc Abs_mes_count_n_2	4
(70,80]	exterior	B	Acc Abs_mes_count_n_2	1
(70,80]	exterior	B	Acc Abs_mes_count_n_2	4
(80,90]	exterior	B	Acc Abs_mes_count_n_2	1
(80,90]	exterior	B	Acc Abs_mes_count_n_2	1
(80,90]	exterior	B	Acc Abs_mes_count_n_2	2
(80,90]	exterior	B	Acc Abs_mes_count_n_2	2
(80,90]	exterior	B	Acc Abs_mes_count_n_2	2
(80,90]	exterior	B	Acc Abs_mes_count_n_2	2
(80,90]	exterior	B	Acc Abs_mes_count_n_2	1
(80,90]	exterior	B	Acc Abs_mes_count_n_2	2
(80,90]	exterior	B	Acc Abs_mes_count_n_2	1
(80,90]	exterior	B	Acc Abs_mes_count_n_2	1
(80,90]	exterior	B	Acc Abs_mes_count_n_2	1
(90,100]	exterior	B	Acc Abs_mes_count_n_2	1
(110,120]	exterior	B	Acc Abs_mes_count_n_2	1
(10,20]	interior	C	Acc Abs_mes_count_n_2	11
(10,20]	interior	C	Acc Abs_mes_count_n_2	12
(10,20]	interior	C	Acc Abs_mes_count_n_2	10
(10,20]	interior	C	Acc Abs_mes_count_n_2	8
(10,20]	interior	C	Acc Abs_mes_count_n_2	5
(10,20]	interior	C	Acc Abs_mes_count_n_2	11
(10,20]	interior	C	Acc Abs_mes_count_n_2	6
(10,20]	interior	C	Acc Abs_mes_count_n_2	13
(10,20]	interior	C	Acc Abs_mes_count_n_2	9
(10,20]	interior	C	Acc Abs_mes_count_n_2	10
(10,20]	interior	C	Acc Abs_mes_count_n_2	10
(10,20]	interior	C	Acc Abs_mes_count_n_2	12
(10,20]	interior	C	Acc Abs_mes_count_n_2	6
(10,20]	interior	C	Acc Abs_mes_count_n_2	13
(10,20]	interior	C	Acc Abs_mes_count_n_2	18
(10,20]	interior	C	Acc Abs_mes_count_n_2	7
(10,20]	interior	C	Acc Abs_mes_count_n_2	8
(10,20]	interior	C	Acc Abs_mes_count_n_2	15
(20,30]	interior	C	Acc Abs_mes_count_n_2	8
(20,30]	interior	C	Acc Abs_mes_count_n_2	8
(20,30]	interior	C	Acc Abs_mes_count_n_2	6
(20,30]	interior	C	Acc Abs_mes_count_n_2	12
(20,30]	interior	C	Acc Abs_mes_count_n_2	10
(20,30]	interior	C	Acc Abs_mes_count_n_2	10
(20,30]	interior	C	Acc Abs_mes_count_n_2	10
(20,30]	interior	C	Acc Abs_mes_count_n_2	9
(20,30]	interior	C	Acc Abs_mes_count_n_2	13
(20,30]	interior	C	Acc Abs_mes_count_n_2	10
(20,30]	interior	C	Acc Abs_mes_count_n_2	6
(20,30]	interior	C	Acc Abs_mes_count_n_2	15
(20,30]	interior	C	Acc Abs_mes_count_n_2	8
(20,30]	interior	C	Acc Abs_mes_count_n_2	11
(20,30]	interior	C	Acc Abs_mes_count_n_2	8
(20,30]	interior	C	Acc Abs_mes_count_n_2	12
(20,30]	interior	C	Acc Abs_mes_count_n_2	8
(20,30]	interior	C	Acc Abs_mes_count_n_2	10
(40,50]	interior	C	Acc Abs_mes_count_n_2	9
(40,50]	interior	C	Acc Abs_mes_count_n_2	13
(40,50]	interior	C	Acc Abs_mes_count_n_2	7
(40,50]	interior	C	Acc Abs_mes_count_n_2	8
(40,50]	interior	C	Acc Abs_mes_count_n_2	14
(40,50]	interior	C	Acc Abs_mes_count_n_2	7
(40,50]	interior	C	Acc Abs_mes_count_n_2	8
(40,50]	interior	C	Acc Abs_mes_count_n_2	10
(40,50]	interior	C	Acc Abs_mes_count_n_2	9
(40,50]	interior	C	Acc Abs_mes_count_n_2	7
(40,50]	interior	C	Acc Abs_mes_count_n_2	8
(40,50]	interior	C	Acc Abs_mes_count_n_2	11
(40,50]	interior	C	Acc Abs_mes_count_n_2	10
(40,50]	interior	C	Acc Abs_mes_count_n_2	9
(40,50]	interior	C	Acc Abs_mes_count_n_2	16
(40,50]	interior	C	Acc Abs_mes_count_n_2	11
(40,50]	interior	C	Acc Abs_mes_count_n_2	12
(40,50]	interior	C	Acc Abs_mes_count_n_2	11
(50,60]	interior	C	Acc Abs_mes_count_n_2	8
(50,60]	interior	C	Acc Abs_mes_count_n_2	10
(50,60]	interior	C	Acc Abs_mes_count_n_2	9
(50,60]	interior	C	Acc Abs_mes_count_n_2	4
(50,60]	interior	C	Acc Abs_mes_count_n_2	9
(50,60]	interior	C	Acc Abs_mes_count_n_2	13
(50,60]	interior	C	Acc Abs_mes_count_n_2	9
(50,60]	interior	C	Acc Abs_mes_count_n_2	6
(50,60]	interior	C	Acc Abs_mes_count_n_2	7
(50,60]	interior	C	Acc Abs_mes_count_n_2	10
(50,60]	interior	C	Acc Abs_mes_count_n_2	12
(50,60]	interior	C	Acc Abs_mes_count_n_2	9
(50,60]	interior	C	Acc Abs_mes_count_n_2	11
(50,60]	interior	C	Acc Abs_mes_count_n_2	5
(50,60]	interior	C	Acc Abs_mes_count_n_2	7
(50,60]	interior	C	Acc Abs_mes_count_n_2	7
(50,60]	interior	C	Acc Abs_mes_count_n_2	6
(50,60]	interior	C	Acc Abs_mes_count_n_2	8
(60,70]	interior	C	Acc Abs_mes_count_n_2	5
(60,70]	interior	C	Acc Abs_mes_count_n_2	3
(60,70]	interior	C	Acc Abs_mes_count_n_2	6
(60,70]	interior	C	Acc Abs_mes_count_n_2	6
(60,70]	interior	C	Acc Abs_mes_count_n_2	3
(60,70]	interior	C	Acc Abs_mes_count_n_2	4
(60,70]	interior	C	Acc Abs_mes_count_n_2	4
(60,70]	interior	C	Acc Abs_mes_count_n_2	10
(60,70]	interior	C	Acc Abs_mes_count_n_2	8
(60,70]	interior	C	Acc Abs_mes_count_n_2	5
(60,70]	interior	C	Acc Abs_mes_count_n_2	4
(60,70]	interior	C	Acc Abs_mes_count_n_2	5
(60,70]	interior	C	Acc Abs_mes_count_n_2	3
(60,70]	interior	C	Acc Abs_mes_count_n_2	8
(60,70]	interior	C	Acc Abs_mes_count_n_2	11
(60,70]	interior	C	Acc Abs_mes_count_n_2	3
(60,70]	interior	C	Acc Abs_mes_count_n_2	6
(60,70]	interior	C	Acc Abs_mes_count_n_2	8
(80,90]	interior	C	Acc Abs_mes_count_n_2	1
(80,90]	interior	C	Acc Abs_mes_count_n_2	2
(80,90]	interior	C	Acc Abs_mes_count_n_2	1
(80,90]	interior	C	Acc Abs_mes_count_n_2	2
(80,90]	interior	C	Acc Abs_mes_count_n_2	1
(80,90]	interior	C	Acc Abs_mes_count_n_2	5
(80,90]	interior	C	Acc Abs_mes_count_n_2	2
(80,90]	interior	C	Acc Abs_mes_count_n_2	1
(80,90]	interior	C	Acc Abs_mes_count_n_2	1
(80,90]	interior	C	Acc Abs_mes_count_n_2	3
(80,90]	interior	C	Acc Abs_mes_count_n_2	1
(80,90]	interior	C	Acc Abs_mes_count_n_2	2
(80,90]	interior	C	Acc Abs_mes_count_n_2	2
(90,100]	interior	C	Acc Abs_mes_count_n_2	1
(90,100]	interior	C	Acc Abs_mes_count_n_2	1
(90,100]	interior	C	Acc Abs_mes_count_n_2	1
(90,100]	interior	C	Acc Abs_mes_count_n_2	1
(90,100]	interior	C	Acc Abs_mes_count_n_2	1
(90,100]	interior	C	Acc Abs_mes_count_n_2	1
(90,100]	interior	C	Acc Abs_mes_count_n_2	1
(90,100]	interior	C	Acc Abs_mes_count_n_2	1
(90,100]	interior	C	Acc Abs_mes_count_n_2	1
(90,100]	interior	C	Acc Abs_mes_count_n_2	1
(90,100]	interior	C	Acc Abs_mes_count_n_2	2
(100,110]	interior	C	Acc Abs_mes_count_n_2	1
(10,20]	exterior	D	Acc Abs_mes_count_n_2	12
(10,20]	exterior	D	Acc Abs_mes_count_n_2	13
(10,20]	exterior	D	Acc Abs_mes_count_n_2	11
(10,20]	exterior	D	Acc Abs_mes_count_n_2	18
(10,20]	exterior	D	Acc Abs_mes_count_n_2	16
(10,20]	exterior	D	Acc Abs_mes_count_n_2	11
(10,20]	exterior	D	Acc Abs_mes_count_n_2	12
(10,20]	exterior	D	Acc Abs_mes_count_n_2	11
(10,20]	exterior	D	Acc Abs_mes_count_n_2	16
(10,20]	exterior	D	Acc Abs_mes_count_n_2	14
(10,20]	exterior	D	Acc Abs_mes_count_n_2	14
(10,20]	exterior	D	Acc Abs_mes_count_n_2	16
(10,20]	exterior	D	Acc Abs_mes_count_n_2	13
(10,20]	exterior	D	Acc Abs_mes_count_n_2	13
(20,30]	exterior	D	Acc Abs_mes_count_n_2	9
(20,30]	exterior	D	Acc Abs_mes_count_n_2	7
(20,30]	exterior	D	Acc Abs_mes_count_n_2	9
(20,30]	exterior	D	Acc Abs_mes_count_n_2	17
(20,30]	exterior	D	Acc Abs_mes_count_n_2	13
(20,30]	exterior	D	Acc Abs_mes_count_n_2	12
(20,30]	exterior	D	Acc Abs_mes_count_n_2	13
(20,30]	exterior	D	Acc Abs_mes_count_n_2	11
(20,30]	exterior	D	Acc Abs_mes_count_n_2	12
(20,30]	exterior	D	Acc Abs_mes_count_n_2	10
(20,30]	exterior	D	Acc Abs_mes_count_n_2	6
(20,30]	exterior	D	Acc Abs_mes_count_n_2	9
(20,30]	exterior	D	Acc Abs_mes_count_n_2	5
(20,30]	exterior	D	Acc Abs_mes_count_n_2	14
(40,50]	exterior	D	Acc Abs_mes_count_n_2	9
(40,50]	exterior	D	Acc Abs_mes_count_n_2	11
(40,50]	exterior	D	Acc Abs_mes_count_n_2	10
(40,50]	exterior	D	Acc Abs_mes_count_n_2	7
(40,50]	exterior	D	Acc Abs_mes_count_n_2	5
(40,50]	exterior	D	Acc Abs_mes_count_n_2	7
(40,50]	exterior	D	Acc Abs_mes_count_n_2	11
(40,50]	exterior	D	Acc Abs_mes_count_n_2	14
(40,50]	exterior	D	Acc Abs_mes_count_n_2	13
(40,50]	exterior	D	Acc Abs_mes_count_n_2	11
(40,50]	exterior	D	Acc Abs_mes_count_n_2	16
(40,50]	exterior	D	Acc Abs_mes_count_n_2	9
(40,50]	exterior	D	Acc Abs_mes_count_n_2	7
(40,50]	exterior	D	Acc Abs_mes_count_n_2	7
(50,60]	exterior	D	Acc Abs_mes_count_n_2	14
(50,60]	exterior	D	Acc Abs_mes_count_n_2	7
(50,60]	exterior	D	Acc Abs_mes_count_n_2	3
(50,60]	exterior	D	Acc Abs_mes_count_n_2	8
(50,60]	exterior	D	Acc Abs_mes_count_n_2	10
(50,60]	exterior	D	Acc Abs_mes_count_n_2	7
(50,60]	exterior	D	Acc Abs_mes_count_n_2	9
(50,60]	exterior	D	Acc Abs_mes_count_n_2	2
(50,60]	exterior	D	Acc Abs_mes_count_n_2	7
(50,60]	exterior	D	Acc Abs_mes_count_n_2	9
(50,60]	exterior	D	Acc Abs_mes_count_n_2	10
(50,60]	exterior	D	Acc Abs_mes_count_n_2	7
(50,60]	exterior	D	Acc Abs_mes_count_n_2	11
(50,60]	exterior	D	Acc Abs_mes_count_n_2	8
(70,80]	exterior	D	Acc Abs_mes_count_n_2	1
(70,80]	exterior	D	Acc Abs_mes_count_n_2	2
(70,80]	exterior	D	Acc Abs_mes_count_n_2	4
(70,80]	exterior	D	Acc Abs_mes_count_n_2	2
(70,80]	exterior	D	Acc Abs_mes_count_n_2	2
(70,80]	exterior	D	Acc Abs_mes_count_n_2	2
(70,80]	exterior	D	Acc Abs_mes_count_n_2	2
(70,80]	exterior	D	Acc Abs_mes_count_n_2	4
(70,80]	exterior	D	Acc Abs_mes_count_n_2	1
(70,80]	exterior	D	Acc Abs_mes_count_n_2	1
(70,80]	exterior	D	Acc Abs_mes_count_n_2	4
(80,90]	exterior	D	Acc Abs_mes_count_n_2	1
(80,90]	exterior	D	Acc Abs_mes_count_n_2	2
(80,90]	exterior	D	Acc Abs_mes_count_n_2	2
(80,90]	exterior	D	Acc Abs_mes_count_n_2	2
(80,90]	exterior	D	Acc Abs_mes_count_n_2	1
(80,90]	exterior	D	Acc Abs_mes_count_n_2	1
(80,90]	exterior	D	Acc Abs_mes_count_n_2	1
(80,90]	exterior	D	Acc Abs_mes_count_n_2	1
(80,90]	exterior	D	Acc Abs_mes_count_n_2	1
(80,90]	exterior	D	Acc Abs_mes_count_n_2	1
(80,90]	exterior	D	Acc Abs_mes_count_n_2	1
(80,90]	exterior	D	Acc Abs_mes_count_n_2	2
(110,120]	exterior	D	Acc Abs_mes_count_n_2	1
(10,20]	exterior	E	Acc Abs_mes_count_n_2	6
(10,20]	exterior	E	Acc Abs_mes_count_n_2	11
(10,20]	exterior	E	Acc Abs_mes_count_n_2	7
(10,20]	exterior	E	Acc Abs_mes_count_n_2	14
(10,20]	exterior	E	Acc Abs_mes_count_n_2	11
(10,20]	exterior	E	Acc Abs_mes_count_n_2	9
(10,20]	exterior	E	Acc Abs_mes_count_n_2	9
(10,20]	exterior	E	Acc Abs_mes_count_n_2	5
(10,20]	exterior	E	Acc Abs_mes_count_n_2	4
(10,20]	exterior	E	Acc Abs_mes_count_n_2	7
(10,20]	exterior	E	Acc Abs_mes_count_n_2	9
(10,20]	exterior	E	Acc Abs_mes_count_n_2	9
(10,20]	exterior	E	Acc Abs_mes_count_n_2	11
(10,20]	exterior	E	Acc Abs_mes_count_n_2	11
(10,20]	exterior	E	Acc Abs_mes_count_n_2	11
(10,20]	exterior	E	Acc Abs_mes_count_n_2	7
(20,30]	exterior	E	Acc Abs_mes_count_n_2	15
(20,30]	exterior	E	Acc Abs_mes_count_n_2	5
(20,30]	exterior	E	Acc Abs_mes_count_n_2	4
(20,30]	exterior	E	Acc Abs_mes_count_n_2	12
(20,30]	exterior	E	Acc Abs_mes_count_n_2	8
(20,30]	exterior	E	Acc Abs_mes_count_n_2	9
(20,30]	exterior	E	Acc Abs_mes_count_n_2	10
(20,30]	exterior	E	Acc Abs_mes_count_n_2	8
(20,30]	exterior	E	Acc Abs_mes_count_n_2	9
(20,30]	exterior	E	Acc Abs_mes_count_n_2	10
(20,30]	exterior	E	Acc Abs_mes_count_n_2	7
(20,30]	exterior	E	Acc Abs_mes_count_n_2	8
(20,30]	exterior	E	Acc Abs_mes_count_n_2	10
(20,30]	exterior	E	Acc Abs_mes_count_n_2	9
(20,30]	exterior	E	Acc Abs_mes_count_n_2	13
(20,30]	exterior	E	Acc Abs_mes_count_n_2	8
(30,40]	exterior	E	Acc Abs_mes_count_n_2	12
(30,40]	exterior	E	Acc Abs_mes_count_n_2	9
(30,40]	exterior	E	Acc Abs_mes_count_n_2	17
(30,40]	exterior	E	Acc Abs_mes_count_n_2	10
(30,40]	exterior	E	Acc Abs_mes_count_n_2	8
(30,40]	exterior	E	Acc Abs_mes_count_n_2	12
(30,40]	exterior	E	Acc Abs_mes_count_n_2	8
(30,40]	exterior	E	Acc Abs_mes_count_n_2	11
(30,40]	exterior	E	Acc Abs_mes_count_n_2	5
(30,40]	exterior	E	Acc Abs_mes_count_n_2	4
(30,40]	exterior	E	Acc Abs_mes_count_n_2	14
(30,40]	exterior	E	Acc Abs_mes_count_n_2	11
(30,40]	exterior	E	Acc Abs_mes_count_n_2	11
(30,40]	exterior	E	Acc Abs_mes_count_n_2	9
(30,40]	exterior	E	Acc Abs_mes_count_n_2	7
(30,40]	exterior	E	Acc Abs_mes_count_n_2	12
(40,50]	exterior	E	Acc Abs_mes_count_n_2	6
(40,50]	exterior	E	Acc Abs_mes_count_n_2	9
(40,50]	exterior	E	Acc Abs_mes_count_n_2	9
(40,50]	exterior	E	Acc Abs_mes_count_n_2	9
(40,50]	exterior	E	Acc Abs_mes_count_n_2	11
(40,50]	exterior	E	Acc Abs_mes_count_n_2	7
(40,50]	exterior	E	Acc Abs_mes_count_n_2	12
(40,50]	exterior	E	Acc Abs_mes_count_n_2	14
(40,50]	exterior	E	Acc Abs_mes_count_n_2	11
(40,50]	exterior	E	Acc Abs_mes_count_n_2	11
(40,50]	exterior	E	Acc Abs_mes_count_n_2	6
(40,50]	exterior	E	Acc Abs_mes_count_n_2	10
(40,50]	exterior	E	Acc Abs_mes_count_n_2	7
(40,50]	exterior	E	Acc Abs_mes_count_n_2	7
(40,50]	exterior	E	Acc Abs_mes_count_n_2	14
(40,50]	exterior	E	Acc Abs_mes_count_n_2	8
(60,70]	exterior	E	Acc Abs_mes_count_n_2	4
(60,70]	exterior	E	Acc Abs_mes_count_n_2	7
(60,70]	exterior	E	Acc Abs_mes_count_n_2	7
(60,70]	exterior	E	Acc Abs_mes_count_n_2	8
(60,70]	exterior	E	Acc Abs_mes_count_n_2	4
(60,70]	exterior	E	Acc Abs_mes_count_n_2	2
(60,70]	exterior	E	Acc Abs_mes_count_n_2	7
(60,70]	exterior	E	Acc Abs_mes_count_n_2	5
(60,70]	exterior	E	Acc Abs_mes_count_n_2	4
(60,70]	exterior	E	Acc Abs_mes_count_n_2	3
(60,70]	exterior	E	Acc Abs_mes_count_n_2	3
(60,70]	exterior	E	Acc Abs_mes_count_n_2	4
(60,70]	exterior	E	Acc Abs_mes_count_n_2	3
(60,70]	exterior	E	Acc Abs_mes_count_n_2	3
(60,70]	exterior	E	Acc Abs_mes_count_n_2	5
(60,70]	exterior	E	Acc Abs_mes_count_n_2	5
(70,80]	exterior	E	Acc Abs_mes_count_n_2	2
(70,80]	exterior	E	Acc Abs_mes_count_n_2	1
(70,80]	exterior	E	Acc Abs_mes_count_n_2	1
(70,80]	exterior	E	Acc Abs_mes_count_n_2	3
(70,80]	exterior	E	Acc Abs_mes_count_n_2	3
(70,80]	exterior	E	Acc Abs_mes_count_n_2	2
(70,80]	exterior	E	Acc Abs_mes_count_n_2	1
(70,80]	exterior	E	Acc Abs_mes_count_n_2	3
(70,80]	exterior	E	Acc Abs_mes_count_n_2	2
(70,80]	exterior	E	Acc Abs_mes_count_n_2	3
(70,80]	exterior	E	Acc Abs_mes_count_n_2	4
(70,80]	exterior	E	Acc Abs_mes_count_n_2	3
(70,80]	exterior	E	Acc Abs_mes_count_n_2	2
(80,90]	exterior	E	Acc Abs_mes_count_n_2	1
(80,90]	exterior	E	Acc Abs_mes_count_n_2	1
(80,90]	exterior	E	Acc Abs_mes_count_n_2	1
(80,90]	exterior	E	Acc Abs_mes_count_n_2	1
(80,90]	exterior	E	Acc Abs_mes_count_n_2	1
(80,90]	exterior	E	Acc Abs_mes_count_n_2	1
(80,90]	exterior	E	Acc Abs_mes_count_n_2	1
(90,100]	exterior	E	Acc Abs_mes_count_n_2	1
(110,120]	exterior	E	Acc Abs_mes_count_n_2	1
(10,20]	interior	F	Acc Abs_mes_count_n_2	8
(10,20]	interior	F	Acc Abs_mes_count_n_2	13
(10,20]	interior	F	Acc Abs_mes_count_n_2	13
(10,20]	interior	F	Acc Abs_mes_count_n_2	16
(10,20]	interior	F	Acc Abs_mes_count_n_2	11
(10,20]	interior	F	Acc Abs_mes_count_n_2	20
(10,20]	interior	F	Acc Abs_mes_count_n_2	6
(10,20]	interior	F	Acc Abs_mes_count_n_2	10
(10,20]	interior	F	Acc Abs_mes_count_n_2	5
(10,20]	interior	F	Acc Abs_mes_count_n_2	15
(10,20]	interior	F	Acc Abs_mes_count_n_2	11
(10,20]	interior	F	Acc Abs_mes_count_n_2	9
(10,20]	interior	F	Acc Abs_mes_count_n_2	12
(10,20]	interior	F	Acc Abs_mes_count_n_2	13
(10,20]	interior	F	Acc Abs_mes_count_n_2	12
(10,20]	interior	F	Acc Abs_mes_count_n_2	14
(20,30]	interior	F	Acc Abs_mes_count_n_2	13
(20,30]	interior	F	Acc Abs_mes_count_n_2	15
(20,30]	interior	F	Acc Abs_mes_count_n_2	10
(20,30]	interior	F	Acc Abs_mes_count_n_2	6
(20,30]	interior	F	Acc Abs_mes_count_n_2	13
(20,30]	interior	F	Acc Abs_mes_count_n_2	5
(20,30]	interior	F	Acc Abs_mes_count_n_2	10
(20,30]	interior	F	Acc Abs_mes_count_n_2	10
(20,30]	interior	F	Acc Abs_mes_count_n_2	7
(20,30]	interior	F	Acc Abs_mes_count_n_2	9
(20,30]	interior	F	Acc Abs_mes_count_n_2	8
(20,30]	interior	F	Acc Abs_mes_count_n_2	13
(20,30]	interior	F	Acc Abs_mes_count_n_2	18
(20,30]	interior	F	Acc Abs_mes_count_n_2	8
(20,30]	interior	F	Acc Abs_mes_count_n_2	12
(20,30]	interior	F	Acc Abs_mes_count_n_2	11
(30,40]	interior	F	Acc Abs_mes_count_n_2	11
(30,40]	interior	F	Acc Abs_mes_count_n_2	7
(30,40]	interior	F	Acc Abs_mes_count_n_2	14
(30,40]	interior	F	Acc Abs_mes_count_n_2	14
(30,40]	interior	F	Acc Abs_mes_count_n_2	12
(30,40]	interior	F	Acc Abs_mes_count_n_2	10
(30,40]	interior	F	Acc Abs_mes_count_n_2	12
(30,40]	interior	F	Acc Abs_mes_count_n_2	10
(30,40]	interior	F	Acc Abs_mes_count_n_2	16
(30,40]	interior	F	Acc Abs_mes_count_n_2	14
(30,40]	interior	F	Acc Abs_mes_count_n_2	10
(30,40]	interior	F	Acc Abs_mes_count_n_2	10
(30,40]	interior	F	Acc Abs_mes_count_n_2	7
(30,40]	interior	F	Acc Abs_mes_count_n_2	6
(30,40]	interior	F	Acc Abs_mes_count_n_2	14
(30,40]	interior	F	Acc Abs_mes_count_n_2	15
(50,60]	interior	F	Acc Abs_mes_count_n_2	8
(50,60]	interior	F	Acc Abs_mes_count_n_2	8
(50,60]	interior	F	Acc Abs_mes_count_n_2	11
(50,60]	interior	F	Acc Abs_mes_count_n_2	11
(50,60]	interior	F	Acc Abs_mes_count_n_2	6
(50,60]	interior	F	Acc Abs_mes_count_n_2	7
(50,60]	interior	F	Acc Abs_mes_count_n_2	8
(50,60]	interior	F	Acc Abs_mes_count_n_2	12
(50,60]	interior	F	Acc Abs_mes_count_n_2	11
(50,60]	interior	F	Acc Abs_mes_count_n_2	10
(50,60]	interior	F	Acc Abs_mes_count_n_2	6
(50,60]	interior	F	Acc Abs_mes_count_n_2	9
(50,60]	interior	F	Acc Abs_mes_count_n_2	11
(50,60]	interior	F	Acc Abs_mes_count_n_2	9
(50,60]	interior	F	Acc Abs_mes_count_n_2	9
(50,60]	interior	F	Acc Abs_mes_count_n_2	12
(60,70]	interior	F	Acc Abs_mes_count_n_2	5
(60,70]	interior	F	Acc Abs_mes_count_n_2	10
(60,70]	interior	F	Acc Abs_mes_count_n_2	2
(60,70]	interior	F	Acc Abs_mes_count_n_2	7
(60,70]	interior	F	Acc Abs_mes_count_n_2	7
(60,70]	interior	F	Acc Abs_mes_count_n_2	6
(60,70]	interior	F	Acc Abs_mes_count_n_2	3
(60,70]	interior	F	Acc Abs_mes_count_n_2	5
(60,70]	interior	F	Acc Abs_mes_count_n_2	3
(60,70]	interior	F	Acc Abs_mes_count_n_2	4
(60,70]	interior	F	Acc Abs_mes_count_n_2	7
(60,70]	interior	F	Acc Abs_mes_count_n_2	6
(60,70]	interior	F	Acc Abs_mes_count_n_2	4
(60,70]	interior	F	Acc Abs_mes_count_n_2	4
(60,70]	interior	F	Acc Abs_mes_count_n_2	5
(60,70]	interior	F	Acc Abs_mes_count_n_2	4
(70,80]	interior	F	Acc Abs_mes_count_n_2	2
(70,80]	interior	F	Acc Abs_mes_count_n_2	2
(70,80]	interior	F	Acc Abs_mes_count_n_2	1
(70,80]	interior	F	Acc Abs_mes_count_n_2	2
(70,80]	interior	F	Acc Abs_mes_count_n_2	1
(70,80]	interior	F	Acc Abs_mes_count_n_2	1
(70,80]	interior	F	Acc Abs_mes_count_n_2	3
(70,80]	interior	F	Acc Abs_mes_count_n_2	1
(70,80]	interior	F	Acc Abs_mes_count_n_2	2
(70,80]	interior	F	Acc Abs_mes_count_n_2	3
(70,80]	interior	F	Acc Abs_mes_count_n_2	1
(70,80]	interior	F	Acc Abs_mes_count_n_2	2
(70,80]	interior	F	Acc Abs_mes_count_n_2	1
(70,80]	interior	F	Acc Abs_mes_count_n_2	4
(90,100]	interior	F	Acc Abs_mes_count_n_2	2
(90,100]	interior	F	Acc Abs_mes_count_n_2	1
(90,100]	interior	F	Acc Abs_mes_count_n_2	1
(90,100]	interior	F	Acc Abs_mes_count_n_2	1
(90,100]	interior	F	Acc Abs_mes_count_n_2	1
(100,110]	interior	F	Acc Abs_mes_count_n_2	1
(100,110]	interior	F	Acc Abs_mes_count_n_2	1
(10,20]	exterior	G	Acc Abs_mes_count_n_2	7
(10,20]	exterior	G	Acc Abs_mes_count_n_2	22
(10,20]	exterior	G	Acc Abs_mes_count_n_2	14
(10,20]	exterior	G	Acc Abs_mes_count_n_2	22
(10,20]	exterior	G	Acc Abs_mes_count_n_2	11
(10,20]	exterior	G	Acc Abs_mes_count_n_2	12
(10,20]	exterior	G	Acc Abs_mes_count_n_2	22
(10,20]	exterior	G	Acc Abs_mes_count_n_2	8
(10,20]	exterior	G	Acc Abs_mes_count_n_2	7
(10,20]	exterior	G	Acc Abs_mes_count_n_2	12
(10,20]	exterior	G	Acc Abs_mes_count_n_2	12
(10,20]	exterior	G	Acc Abs_mes_count_n_2	14
(10,20]	exterior	G	Acc Abs_mes_count_n_2	15
(10,20]	exterior	G	Acc Abs_mes_count_n_2	19
(10,20]	exterior	G	Acc Abs_mes_count_n_2	21
(10,20]	exterior	G	Acc Abs_mes_count_n_2	11
(10,20]	exterior	G	Acc Abs_mes_count_n_2	20
(10,20]	exterior	G	Acc Abs_mes_count_n_2	16
(30,40]	exterior	G	Acc Abs_mes_count_n_2	30
(30,40]	exterior	G	Acc Abs_mes_count_n_2	16
(30,40]	exterior	G	Acc Abs_mes_count_n_2	17
(30,40]	exterior	G	Acc Abs_mes_count_n_2	12
(30,40]	exterior	G	Acc Abs_mes_count_n_2	13
(30,40]	exterior	G	Acc Abs_mes_count_n_2	9
(30,40]	exterior	G	Acc Abs_mes_count_n_2	15
(30,40]	exterior	G	Acc Abs_mes_count_n_2	12
(30,40]	exterior	G	Acc Abs_mes_count_n_2	15
(30,40]	exterior	G	Acc Abs_mes_count_n_2	16
(30,40]	exterior	G	Acc Abs_mes_count_n_2	9
(30,40]	exterior	G	Acc Abs_mes_count_n_2	10
(30,40]	exterior	G	Acc Abs_mes_count_n_2	10
(30,40]	exterior	G	Acc Abs_mes_count_n_2	14
(30,40]	exterior	G	Acc Abs_mes_count_n_2	14
(30,40]	exterior	G	Acc Abs_mes_count_n_2	15
(30,40]	exterior	G	Acc Abs_mes_count_n_2	16
(30,40]	exterior	G	Acc Abs_mes_count_n_2	11
(40,50]	exterior	G	Acc Abs_mes_count_n_2	9
(40,50]	exterior	G	Acc Abs_mes_count_n_2	17
(40,50]	exterior	G	Acc Abs_mes_count_n_2	17
(40,50]	exterior	G	Acc Abs_mes_count_n_2	11
(40,50]	exterior	G	Acc Abs_mes_count_n_2	12
(40,50]	exterior	G	Acc Abs_mes_count_n_2	12
(40,50]	exterior	G	Acc Abs_mes_count_n_2	13
(40,50]	exterior	G	Acc Abs_mes_count_n_2	12
(40,50]	exterior	G	Acc Abs_mes_count_n_2	6
(40,50]	exterior	G	Acc Abs_mes_count_n_2	11
(40,50]	exterior	G	Acc Abs_mes_count_n_2	10
(40,50]	exterior	G	Acc Abs_mes_count_n_2	14
(40,50]	exterior	G	Acc Abs_mes_count_n_2	13
(40,50]	exterior	G	Acc Abs_mes_count_n_2	16
(40,50]	exterior	G	Acc Abs_mes_count_n_2	12
(40,50]	exterior	G	Acc Abs_mes_count_n_2	14
(40,50]	exterior	G	Acc Abs_mes_count_n_2	12
(40,50]	exterior	G	Acc Abs_mes_count_n_2	10
(60,70]	exterior	G	Acc Abs_mes_count_n_2	5
(60,70]	exterior	G	Acc Abs_mes_count_n_2	6
(60,70]	exterior	G	Acc Abs_mes_count_n_2	7
(60,70]	exterior	G	Acc Abs_mes_count_n_2	2
(60,70]	exterior	G	Acc Abs_mes_count_n_2	4
(60,70]	exterior	G	Acc Abs_mes_count_n_2	11
(60,70]	exterior	G	Acc Abs_mes_count_n_2	3
(60,70]	exterior	G	Acc Abs_mes_count_n_2	6
(60,70]	exterior	G	Acc Abs_mes_count_n_2	4
(60,70]	exterior	G	Acc Abs_mes_count_n_2	10
(60,70]	exterior	G	Acc Abs_mes_count_n_2	5
(60,70]	exterior	G	Acc Abs_mes_count_n_2	4
(60,70]	exterior	G	Acc Abs_mes_count_n_2	4
(60,70]	exterior	G	Acc Abs_mes_count_n_2	3
(60,70]	exterior	G	Acc Abs_mes_count_n_2	8
(60,70]	exterior	G	Acc Abs_mes_count_n_2	2
(60,70]	exterior	G	Acc Abs_mes_count_n_2	8
(60,70]	exterior	G	Acc Abs_mes_count_n_2	7
(70,80]	exterior	G	Acc Abs_mes_count_n_2	4
(70,80]	exterior	G	Acc Abs_mes_count_n_2	4
(70,80]	exterior	G	Acc Abs_mes_count_n_2	4
(70,80]	exterior	G	Acc Abs_mes_count_n_2	1
(70,80]	exterior	G	Acc Abs_mes_count_n_2	3
(70,80]	exterior	G	Acc Abs_mes_count_n_2	3
(70,80]	exterior	G	Acc Abs_mes_count_n_2	4
(70,80]	exterior	G	Acc Abs_mes_count_n_2	2
(70,80]	exterior	G	Acc Abs_mes_count_n_2	3
(70,80]	exterior	G	Acc Abs_mes_count_n_2	3
(70,80]	exterior	G	Acc Abs_mes_count_n_2	1
(70,80]	exterior	G	Acc Abs_mes_count_n_2	1
(70,80]	exterior	G	Acc Abs_mes_count_n_2	1
(70,80]	exterior	G	Acc Abs_mes_count_n_2	3
(70,80]	exterior	G	Acc Abs_mes_count_n_2	2
(70,80]	exterior	G	Acc Abs_mes_count_n_2	7
(90,100]	exterior	G	Acc Abs_mes_count_n_2	1
(90,100]	exterior	G	Acc Abs_mes_count_n_2	1
(90,100]	exterior	G	Acc Abs_mes_count_n_2	1
(90,100]	exterior	G	Acc Abs_mes_count_n_2	1
(90,100]	exterior	G	Acc Abs_mes_count_n_2	1
(90,100]	exterior	G	Acc Abs_mes_count_n_2	1
(90,100]	exterior	G	Acc Abs_mes_count_n_2	1
(90,100]	exterior	G	Acc Abs_mes_count_n_2	1
(90,100]	exterior	G	Acc Abs_mes_count_n_2	2
(110,120]	exterior	G	Acc Abs_mes_count_n_2	1
(10,20]	exterior	H	Acc Abs_mes_count_n_2	6
(10,20]	exterior	H	Acc Abs_mes_count_n_2	10
(10,20]	exterior	H	Acc Abs_mes_count_n_2	12
(30,40]	exterior	H	Acc Abs_mes_count_n_2	10
(30,40]	exterior	H	Acc Abs_mes_count_n_2	8
(30,40]	exterior	H	Acc Abs_mes_count_n_2	5
(40,50]	exterior	H	Acc Abs_mes_count_n_2	6
(40,50]	exterior	H	Acc Abs_mes_count_n_2	10
(40,50]	exterior	H	Acc Abs_mes_count_n_2	7
(60,70]	exterior	H	Acc Abs_mes_count_n_2	11
(60,70]	exterior	H	Acc Abs_mes_count_n_2	7
(60,70]	exterior	H	Acc Abs_mes_count_n_2	7
(80,90]	exterior	H	Acc Abs_mes_count_n_2	11
(80,90]	exterior	H	Acc Abs_mes_count_n_2	2
(80,90]	exterior	H	Acc Abs_mes_count_n_2	3
(90,100]	exterior	H	Acc Abs_mes_count_n_2	1
(90,100]	exterior	H	Acc Abs_mes_count_n_2	1
(110,120]	exterior	H	Acc Abs_mes_count_n_2	4
(10,20]	exterior	I	Acc Abs_mes_count_n_2	18
(10,20]	exterior	I	Acc Abs_mes_count_n_2	9
(10,20]	exterior	I	Acc Abs_mes_count_n_2	17
(10,20]	exterior	I	Acc Abs_mes_count_n_2	11
(10,20]	exterior	I	Acc Abs_mes_count_n_2	21
(10,20]	exterior	I	Acc Abs_mes_count_n_2	11
(10,20]	exterior	I	Acc Abs_mes_count_n_2	9
(10,20]	exterior	I	Acc Abs_mes_count_n_2	8
(10,20]	exterior	I	Acc Abs_mes_count_n_2	10
(10,20]	exterior	I	Acc Abs_mes_count_n_2	4
(10,20]	exterior	I	Acc Abs_mes_count_n_2	11
(10,20]	exterior	I	Acc Abs_mes_count_n_2	9
(10,20]	exterior	I	Acc Abs_mes_count_n_2	7
(10,20]	exterior	I	Acc Abs_mes_count_n_2	13
(10,20]	exterior	I	Acc Abs_mes_count_n_2	1
(10,20]	exterior	I	Acc Abs_mes_count_n_2	8
(10,20]	exterior	I	Acc Abs_mes_count_n_2	13
(10,20]	exterior	I	Acc Abs_mes_count_n_2	9
(20,30]	exterior	I	Acc Abs_mes_count_n_2	11
(20,30]	exterior	I	Acc Abs_mes_count_n_2	18
(20,30]	exterior	I	Acc Abs_mes_count_n_2	12
(20,30]	exterior	I	Acc Abs_mes_count_n_2	14
(20,30]	exterior	I	Acc Abs_mes_count_n_2	12
(20,30]	exterior	I	Acc Abs_mes_count_n_2	6
(20,30]	exterior	I	Acc Abs_mes_count_n_2	10
(20,30]	exterior	I	Acc Abs_mes_count_n_2	9
(20,30]	exterior	I	Acc Abs_mes_count_n_2	14
(20,30]	exterior	I	Acc Abs_mes_count_n_2	8
(20,30]	exterior	I	Acc Abs_mes_count_n_2	7
(20,30]	exterior	I	Acc Abs_mes_count_n_2	9
(20,30]	exterior	I	Acc Abs_mes_count_n_2	8
(20,30]	exterior	I	Acc Abs_mes_count_n_2	8
(20,30]	exterior	I	Acc Abs_mes_count_n_2	4
(20,30]	exterior	I	Acc Abs_mes_count_n_2	7
(20,30]	exterior	I	Acc Abs_mes_count_n_2	8
(20,30]	exterior	I	Acc Abs_mes_count_n_2	11
(40,50]	exterior	I	Acc Abs_mes_count_n_2	11
(40,50]	exterior	I	Acc Abs_mes_count_n_2	10
(40,50]	exterior	I	Acc Abs_mes_count_n_2	13
(40,50]	exterior	I	Acc Abs_mes_count_n_2	13
(40,50]	exterior	I	Acc Abs_mes_count_n_2	13
(40,50]	exterior	I	Acc Abs_mes_count_n_2	9
(40,50]	exterior	I	Acc Abs_mes_count_n_2	16
(40,50]	exterior	I	Acc Abs_mes_count_n_2	9
(40,50]	exterior	I	Acc Abs_mes_count_n_2	8
(40,50]	exterior	I	Acc Abs_mes_count_n_2	14
(40,50]	exterior	I	Acc Abs_mes_count_n_2	7
(40,50]	exterior	I	Acc Abs_mes_count_n_2	9
(40,50]	exterior	I	Acc Abs_mes_count_n_2	12
(40,50]	exterior	I	Acc Abs_mes_count_n_2	8
(40,50]	exterior	I	Acc Abs_mes_count_n_2	4
(40,50]	exterior	I	Acc Abs_mes_count_n_2	10
(40,50]	exterior	I	Acc Abs_mes_count_n_2	11
(40,50]	exterior	I	Acc Abs_mes_count_n_2	9
(50,60]	exterior	I	Acc Abs_mes_count_n_2	9
(50,60]	exterior	I	Acc Abs_mes_count_n_2	9
(50,60]	exterior	I	Acc Abs_mes_count_n_2	6
(50,60]	exterior	I	Acc Abs_mes_count_n_2	9
(50,60]	exterior	I	Acc Abs_mes_count_n_2	10
(50,60]	exterior	I	Acc Abs_mes_count_n_2	9
(50,60]	exterior	I	Acc Abs_mes_count_n_2	7
(50,60]	exterior	I	Acc Abs_mes_count_n_2	7
(50,60]	exterior	I	Acc Abs_mes_count_n_2	10
(50,60]	exterior	I	Acc Abs_mes_count_n_2	12
(50,60]	exterior	I	Acc Abs_mes_count_n_2	12
(50,60]	exterior	I	Acc Abs_mes_count_n_2	5
(50,60]	exterior	I	Acc Abs_mes_count_n_2	9
(50,60]	exterior	I	Acc Abs_mes_count_n_2	7
(50,60]	exterior	I	Acc Abs_mes_count_n_2	4
(50,60]	exterior	I	Acc Abs_mes_count_n_2	11
(50,60]	exterior	I	Acc Abs_mes_count_n_2	6
(50,60]	exterior	I	Acc Abs_mes_count_n_2	6
(70,80]	exterior	I	Acc Abs_mes_count_n_2	4
(70,80]	exterior	I	Acc Abs_mes_count_n_2	2
(70,80]	exterior	I	Acc Abs_mes_count_n_2	5
(70,80]	exterior	I	Acc Abs_mes_count_n_2	4
(70,80]	exterior	I	Acc Abs_mes_count_n_2	5
(70,80]	exterior	I	Acc Abs_mes_count_n_2	6
(70,80]	exterior	I	Acc Abs_mes_count_n_2	5
(70,80]	exterior	I	Acc Abs_mes_count_n_2	3
(70,80]	exterior	I	Acc Abs_mes_count_n_2	2
(70,80]	exterior	I	Acc Abs_mes_count_n_2	5
(70,80]	exterior	I	Acc Abs_mes_count_n_2	4
(70,80]	exterior	I	Acc Abs_mes_count_n_2	6
(70,80]	exterior	I	Acc Abs_mes_count_n_2	3
(70,80]	exterior	I	Acc Abs_mes_count_n_2	2
(70,80]	exterior	I	Acc Abs_mes_count_n_2	1
(70,80]	exterior	I	Acc Abs_mes_count_n_2	8
(70,80]	exterior	I	Acc Abs_mes_count_n_2	2
(70,80]	exterior	I	Acc Abs_mes_count_n_2	6
(80,90]	exterior	I	Acc Abs_mes_count_n_2	1
(80,90]	exterior	I	Acc Abs_mes_count_n_2	3
(80,90]	exterior	I	Acc Abs_mes_count_n_2	2
(80,90]	exterior	I	Acc Abs_mes_count_n_2	1
(80,90]	exterior	I	Acc Abs_mes_count_n_2	1
(80,90]	exterior	I	Acc Abs_mes_count_n_2	2
(80,90]	exterior	I	Acc Abs_mes_count_n_2	1
(80,90]	exterior	I	Acc Abs_mes_count_n_2	1
(80,90]	exterior	I	Acc Abs_mes_count_n_2	1
(80,90]	exterior	I	Acc Abs_mes_count_n_2	3
(80,90]	exterior	I	Acc Abs_mes_count_n_2	2
(80,90]	exterior	I	Acc Abs_mes_count_n_2	1
(100,110]	exterior	I	Acc Abs_mes_count_n_2	1
(100,110]	exterior	I	Acc Abs_mes_count_n_2	1
(20,30]	exterior	A	Acc Abs_mes_count_n_3	13
(20,30]	exterior	A	Acc Abs_mes_count_n_3	26
(20,30]	exterior	A	Acc Abs_mes_count_n_3	13
(20,30]	exterior	A	Acc Abs_mes_count_n_3	18
(20,30]	exterior	A	Acc Abs_mes_count_n_3	17
(20,30]	exterior	A	Acc Abs_mes_count_n_3	17
(20,30]	exterior	A	Acc Abs_mes_count_n_3	14
(20,30]	exterior	A	Acc Abs_mes_count_n_3	14
(20,30]	exterior	A	Acc Abs_mes_count_n_3	13
(20,30]	exterior	A	Acc Abs_mes_count_n_3	12
(20,30]	exterior	A	Acc Abs_mes_count_n_3	15
(20,30]	exterior	A	Acc Abs_mes_count_n_3	15
(20,30]	exterior	A	Acc Abs_mes_count_n_3	16
(20,30]	exterior	A	Acc Abs_mes_count_n_3	18
(20,30]	exterior	A	Acc Abs_mes_count_n_3	26
(20,30]	exterior	A	Acc Abs_mes_count_n_3	17
(20,30]	exterior	A	Acc Abs_mes_count_n_3	17
(20,30]	exterior	A	Acc Abs_mes_count_n_3	18
(40,50]	exterior	A	Acc Abs_mes_count_n_3	11
(40,50]	exterior	A	Acc Abs_mes_count_n_3	12
(40,50]	exterior	A	Acc Abs_mes_count_n_3	13
(40,50]	exterior	A	Acc Abs_mes_count_n_3	8
(40,50]	exterior	A	Acc Abs_mes_count_n_3	6
(40,50]	exterior	A	Acc Abs_mes_count_n_3	8
(40,50]	exterior	A	Acc Abs_mes_count_n_3	4
(40,50]	exterior	A	Acc Abs_mes_count_n_3	7
(40,50]	exterior	A	Acc Abs_mes_count_n_3	11
(40,50]	exterior	A	Acc Abs_mes_count_n_3	9
(40,50]	exterior	A	Acc Abs_mes_count_n_3	9
(40,50]	exterior	A	Acc Abs_mes_count_n_3	11
(40,50]	exterior	A	Acc Abs_mes_count_n_3	9
(40,50]	exterior	A	Acc Abs_mes_count_n_3	7
(40,50]	exterior	A	Acc Abs_mes_count_n_3	12
(40,50]	exterior	A	Acc Abs_mes_count_n_3	7
(40,50]	exterior	A	Acc Abs_mes_count_n_3	10
(40,50]	exterior	A	Acc Abs_mes_count_n_3	8
(60,70]	exterior	A	Acc Abs_mes_count_n_3	4
(60,70]	exterior	A	Acc Abs_mes_count_n_3	5
(60,70]	exterior	A	Acc Abs_mes_count_n_3	2
(60,70]	exterior	A	Acc Abs_mes_count_n_3	3
(60,70]	exterior	A	Acc Abs_mes_count_n_3	4
(60,70]	exterior	A	Acc Abs_mes_count_n_3	4
(60,70]	exterior	A	Acc Abs_mes_count_n_3	2
(60,70]	exterior	A	Acc Abs_mes_count_n_3	4
(60,70]	exterior	A	Acc Abs_mes_count_n_3	6
(60,70]	exterior	A	Acc Abs_mes_count_n_3	4
(60,70]	exterior	A	Acc Abs_mes_count_n_3	5
(60,70]	exterior	A	Acc Abs_mes_count_n_3	1
(60,70]	exterior	A	Acc Abs_mes_count_n_3	1
(60,70]	exterior	A	Acc Abs_mes_count_n_3	1
(60,70]	exterior	A	Acc Abs_mes_count_n_3	2
(60,70]	exterior	A	Acc Abs_mes_count_n_3	5
(90,100]	exterior	A	Acc Abs_mes_count_n_3	1
(90,100]	exterior	A	Acc Abs_mes_count_n_3	1
(90,100]	exterior	A	Acc Abs_mes_count_n_3	1
(90,100]	exterior	A	Acc Abs_mes_count_n_3	1
(90,100]	exterior	A	Acc Abs_mes_count_n_3	1
(90,100]	exterior	A	Acc Abs_mes_count_n_3	1
(110,120]	exterior	A	Acc Abs_mes_count_n_3	1
(10,20]	exterior	B	Acc Abs_mes_count_n_3	16
(10,20]	exterior	B	Acc Abs_mes_count_n_3	21
(10,20]	exterior	B	Acc Abs_mes_count_n_3	18
(10,20]	exterior	B	Acc Abs_mes_count_n_3	24
(10,20]	exterior	B	Acc Abs_mes_count_n_3	15
(10,20]	exterior	B	Acc Abs_mes_count_n_3	15
(10,20]	exterior	B	Acc Abs_mes_count_n_3	14
(10,20]	exterior	B	Acc Abs_mes_count_n_3	15
(10,20]	exterior	B	Acc Abs_mes_count_n_3	12
(10,20]	exterior	B	Acc Abs_mes_count_n_3	15
(10,20]	exterior	B	Acc Abs_mes_count_n_3	11
(10,20]	exterior	B	Acc Abs_mes_count_n_3	17
(10,20]	exterior	B	Acc Abs_mes_count_n_3	17
(10,20]	exterior	B	Acc Abs_mes_count_n_3	21
(10,20]	exterior	B	Acc Abs_mes_count_n_3	23
(10,20]	exterior	B	Acc Abs_mes_count_n_3	9
(10,20]	exterior	B	Acc Abs_mes_count_n_3	13
(10,20]	exterior	B	Acc Abs_mes_count_n_3	13
(30,40]	exterior	B	Acc Abs_mes_count_n_3	8
(30,40]	exterior	B	Acc Abs_mes_count_n_3	18
(30,40]	exterior	B	Acc Abs_mes_count_n_3	10
(30,40]	exterior	B	Acc Abs_mes_count_n_3	7
(30,40]	exterior	B	Acc Abs_mes_count_n_3	17
(30,40]	exterior	B	Acc Abs_mes_count_n_3	8
(30,40]	exterior	B	Acc Abs_mes_count_n_3	10
(30,40]	exterior	B	Acc Abs_mes_count_n_3	10
(30,40]	exterior	B	Acc Abs_mes_count_n_3	10
(30,40]	exterior	B	Acc Abs_mes_count_n_3	13
(30,40]	exterior	B	Acc Abs_mes_count_n_3	10
(30,40]	exterior	B	Acc Abs_mes_count_n_3	14
(30,40]	exterior	B	Acc Abs_mes_count_n_3	12
(30,40]	exterior	B	Acc Abs_mes_count_n_3	13
(30,40]	exterior	B	Acc Abs_mes_count_n_3	13
(30,40]	exterior	B	Acc Abs_mes_count_n_3	12
(30,40]	exterior	B	Acc Abs_mes_count_n_3	10
(30,40]	exterior	B	Acc Abs_mes_count_n_3	10
(50,60]	exterior	B	Acc Abs_mes_count_n_3	4
(50,60]	exterior	B	Acc Abs_mes_count_n_3	5
(50,60]	exterior	B	Acc Abs_mes_count_n_3	7
(50,60]	exterior	B	Acc Abs_mes_count_n_3	4
(50,60]	exterior	B	Acc Abs_mes_count_n_3	7
(50,60]	exterior	B	Acc Abs_mes_count_n_3	1
(50,60]	exterior	B	Acc Abs_mes_count_n_3	6
(50,60]	exterior	B	Acc Abs_mes_count_n_3	5
(50,60]	exterior	B	Acc Abs_mes_count_n_3	6
(50,60]	exterior	B	Acc Abs_mes_count_n_3	3
(50,60]	exterior	B	Acc Abs_mes_count_n_3	3
(50,60]	exterior	B	Acc Abs_mes_count_n_3	4
(50,60]	exterior	B	Acc Abs_mes_count_n_3	5
(50,60]	exterior	B	Acc Abs_mes_count_n_3	5
(50,60]	exterior	B	Acc Abs_mes_count_n_3	8
(50,60]	exterior	B	Acc Abs_mes_count_n_3	4
(50,60]	exterior	B	Acc Abs_mes_count_n_3	3
(50,60]	exterior	B	Acc Abs_mes_count_n_3	12
(70,80]	exterior	B	Acc Abs_mes_count_n_3	1
(70,80]	exterior	B	Acc Abs_mes_count_n_3	1
(70,80]	exterior	B	Acc Abs_mes_count_n_3	3
(70,80]	exterior	B	Acc Abs_mes_count_n_3	3
(70,80]	exterior	B	Acc Abs_mes_count_n_3	3
(70,80]	exterior	B	Acc Abs_mes_count_n_3	3
(70,80]	exterior	B	Acc Abs_mes_count_n_3	1
(70,80]	exterior	B	Acc Abs_mes_count_n_3	3
(70,80]	exterior	B	Acc Abs_mes_count_n_3	2
(70,80]	exterior	B	Acc Abs_mes_count_n_3	2
(70,80]	exterior	B	Acc Abs_mes_count_n_3	2
(70,80]	exterior	B	Acc Abs_mes_count_n_3	2
(70,80]	exterior	B	Acc Abs_mes_count_n_3	3
(70,80]	exterior	B	Acc Abs_mes_count_n_3	1
(70,80]	exterior	B	Acc Abs_mes_count_n_3	1
(90,100]	exterior	B	Acc Abs_mes_count_n_3	1
(90,100]	exterior	B	Acc Abs_mes_count_n_3	1
(90,100]	exterior	B	Acc Abs_mes_count_n_3	1
(90,100]	exterior	B	Acc Abs_mes_count_n_3	2
(90,100]	exterior	B	Acc Abs_mes_count_n_3	1
(90,100]	exterior	B	Acc Abs_mes_count_n_3	1
(20,30]	interior	C	Acc Abs_mes_count_n_3	21
(20,30]	interior	C	Acc Abs_mes_count_n_3	15
(20,30]	interior	C	Acc Abs_mes_count_n_3	12
(20,30]	interior	C	Acc Abs_mes_count_n_3	9
(20,30]	interior	C	Acc Abs_mes_count_n_3	12
(20,30]	interior	C	Acc Abs_mes_count_n_3	11
(20,30]	interior	C	Acc Abs_mes_count_n_3	14
(20,30]	interior	C	Acc Abs_mes_count_n_3	13
(20,30]	interior	C	Acc Abs_mes_count_n_3	15
(20,30]	interior	C	Acc Abs_mes_count_n_3	15
(20,30]	interior	C	Acc Abs_mes_count_n_3	13
(20,30]	interior	C	Acc Abs_mes_count_n_3	26
(20,30]	interior	C	Acc Abs_mes_count_n_3	18
(20,30]	interior	C	Acc Abs_mes_count_n_3	19
(20,30]	interior	C	Acc Abs_mes_count_n_3	19
(20,30]	interior	C	Acc Abs_mes_count_n_3	18
(20,30]	interior	C	Acc Abs_mes_count_n_3	12
(20,30]	interior	C	Acc Abs_mes_count_n_3	17
(40,50]	interior	C	Acc Abs_mes_count_n_3	8
(40,50]	interior	C	Acc Abs_mes_count_n_3	9
(40,50]	interior	C	Acc Abs_mes_count_n_3	4
(40,50]	interior	C	Acc Abs_mes_count_n_3	10
(40,50]	interior	C	Acc Abs_mes_count_n_3	9
(40,50]	interior	C	Acc Abs_mes_count_n_3	9
(40,50]	interior	C	Acc Abs_mes_count_n_3	10
(40,50]	interior	C	Acc Abs_mes_count_n_3	10
(40,50]	interior	C	Acc Abs_mes_count_n_3	8
(40,50]	interior	C	Acc Abs_mes_count_n_3	10
(40,50]	interior	C	Acc Abs_mes_count_n_3	7
(40,50]	interior	C	Acc Abs_mes_count_n_3	5
(40,50]	interior	C	Acc Abs_mes_count_n_3	3
(40,50]	interior	C	Acc Abs_mes_count_n_3	11
(40,50]	interior	C	Acc Abs_mes_count_n_3	5
(40,50]	interior	C	Acc Abs_mes_count_n_3	11
(40,50]	interior	C	Acc Abs_mes_count_n_3	7
(60,70]	interior	C	Acc Abs_mes_count_n_3	3
(60,70]	interior	C	Acc Abs_mes_count_n_3	4
(60,70]	interior	C	Acc Abs_mes_count_n_3	4
(60,70]	interior	C	Acc Abs_mes_count_n_3	3
(60,70]	interior	C	Acc Abs_mes_count_n_3	5
(60,70]	interior	C	Acc Abs_mes_count_n_3	5
(60,70]	interior	C	Acc Abs_mes_count_n_3	1
(60,70]	interior	C	Acc Abs_mes_count_n_3	3
(60,70]	interior	C	Acc Abs_mes_count_n_3	3
(60,70]	interior	C	Acc Abs_mes_count_n_3	4
(60,70]	interior	C	Acc Abs_mes_count_n_3	2
(60,70]	interior	C	Acc Abs_mes_count_n_3	2
(60,70]	interior	C	Acc Abs_mes_count_n_3	3
(60,70]	interior	C	Acc Abs_mes_count_n_3	5
(60,70]	interior	C	Acc Abs_mes_count_n_3	5
(60,70]	interior	C	Acc Abs_mes_count_n_3	2
(60,70]	interior	C	Acc Abs_mes_count_n_3	4
(90,100]	interior	C	Acc Abs_mes_count_n_3	1
(90,100]	interior	C	Acc Abs_mes_count_n_3	1
(90,100]	interior	C	Acc Abs_mes_count_n_3	1
(90,100]	interior	C	Acc Abs_mes_count_n_3	1
(90,100]	interior	C	Acc Abs_mes_count_n_3	1
(90,100]	interior	C	Acc Abs_mes_count_n_3	2
(90,100]	interior	C	Acc Abs_mes_count_n_3	2
(90,100]	interior	C	Acc Abs_mes_count_n_3	2
(90,100]	interior	C	Acc Abs_mes_count_n_3	2
(90,100]	interior	C	Acc Abs_mes_count_n_3	1
(90,100]	interior	C	Acc Abs_mes_count_n_3	1
(110,120]	interior	C	Acc Abs_mes_count_n_3	1
(10,20]	exterior	D	Acc Abs_mes_count_n_3	13
(10,20]	exterior	D	Acc Abs_mes_count_n_3	17
(10,20]	exterior	D	Acc Abs_mes_count_n_3	16
(10,20]	exterior	D	Acc Abs_mes_count_n_3	19
(10,20]	exterior	D	Acc Abs_mes_count_n_3	20
(10,20]	exterior	D	Acc Abs_mes_count_n_3	10
(10,20]	exterior	D	Acc Abs_mes_count_n_3	22
(10,20]	exterior	D	Acc Abs_mes_count_n_3	17
(10,20]	exterior	D	Acc Abs_mes_count_n_3	14
(10,20]	exterior	D	Acc Abs_mes_count_n_3	21
(10,20]	exterior	D	Acc Abs_mes_count_n_3	20
(10,20]	exterior	D	Acc Abs_mes_count_n_3	11
(10,20]	exterior	D	Acc Abs_mes_count_n_3	16
(10,20]	exterior	D	Acc Abs_mes_count_n_3	12
(30,40]	exterior	D	Acc Abs_mes_count_n_3	8
(30,40]	exterior	D	Acc Abs_mes_count_n_3	7
(30,40]	exterior	D	Acc Abs_mes_count_n_3	7
(30,40]	exterior	D	Acc Abs_mes_count_n_3	6
(30,40]	exterior	D	Acc Abs_mes_count_n_3	8
(30,40]	exterior	D	Acc Abs_mes_count_n_3	7
(30,40]	exterior	D	Acc Abs_mes_count_n_3	5
(30,40]	exterior	D	Acc Abs_mes_count_n_3	6
(30,40]	exterior	D	Acc Abs_mes_count_n_3	9
(30,40]	exterior	D	Acc Abs_mes_count_n_3	7
(30,40]	exterior	D	Acc Abs_mes_count_n_3	4
(30,40]	exterior	D	Acc Abs_mes_count_n_3	12
(30,40]	exterior	D	Acc Abs_mes_count_n_3	8
(30,40]	exterior	D	Acc Abs_mes_count_n_3	10
(50,60]	exterior	D	Acc Abs_mes_count_n_3	4
(50,60]	exterior	D	Acc Abs_mes_count_n_3	4
(50,60]	exterior	D	Acc Abs_mes_count_n_3	2
(50,60]	exterior	D	Acc Abs_mes_count_n_3	3
(50,60]	exterior	D	Acc Abs_mes_count_n_3	2
(50,60]	exterior	D	Acc Abs_mes_count_n_3	4
(50,60]	exterior	D	Acc Abs_mes_count_n_3	2
(50,60]	exterior	D	Acc Abs_mes_count_n_3	3
(50,60]	exterior	D	Acc Abs_mes_count_n_3	3
(50,60]	exterior	D	Acc Abs_mes_count_n_3	1
(50,60]	exterior	D	Acc Abs_mes_count_n_3	1
(70,80]	exterior	D	Acc Abs_mes_count_n_3	1
(70,80]	exterior	D	Acc Abs_mes_count_n_3	1
(70,80]	exterior	D	Acc Abs_mes_count_n_3	1
(70,80]	exterior	D	Acc Abs_mes_count_n_3	1
(130,140]	exterior	D	Acc Abs_mes_count_n_3	1
(10,20]	exterior	E	Acc Abs_mes_count_n_3	17
(10,20]	exterior	E	Acc Abs_mes_count_n_3	12
(10,20]	exterior	E	Acc Abs_mes_count_n_3	13
(10,20]	exterior	E	Acc Abs_mes_count_n_3	17
(10,20]	exterior	E	Acc Abs_mes_count_n_3	20
(10,20]	exterior	E	Acc Abs_mes_count_n_3	16
(10,20]	exterior	E	Acc Abs_mes_count_n_3	15
(10,20]	exterior	E	Acc Abs_mes_count_n_3	13
(10,20]	exterior	E	Acc Abs_mes_count_n_3	9
(10,20]	exterior	E	Acc Abs_mes_count_n_3	18
(10,20]	exterior	E	Acc Abs_mes_count_n_3	9
(10,20]	exterior	E	Acc Abs_mes_count_n_3	12
(10,20]	exterior	E	Acc Abs_mes_count_n_3	18
(10,20]	exterior	E	Acc Abs_mes_count_n_3	12
(10,20]	exterior	E	Acc Abs_mes_count_n_3	17
(10,20]	exterior	E	Acc Abs_mes_count_n_3	12
(30,40]	exterior	E	Acc Abs_mes_count_n_3	14
(30,40]	exterior	E	Acc Abs_mes_count_n_3	14
(30,40]	exterior	E	Acc Abs_mes_count_n_3	11
(30,40]	exterior	E	Acc Abs_mes_count_n_3	17
(30,40]	exterior	E	Acc Abs_mes_count_n_3	8
(30,40]	exterior	E	Acc Abs_mes_count_n_3	8
(30,40]	exterior	E	Acc Abs_mes_count_n_3	14
(30,40]	exterior	E	Acc Abs_mes_count_n_3	12
(30,40]	exterior	E	Acc Abs_mes_count_n_3	14
(30,40]	exterior	E	Acc Abs_mes_count_n_3	7
(30,40]	exterior	E	Acc Abs_mes_count_n_3	10
(30,40]	exterior	E	Acc Abs_mes_count_n_3	10
(30,40]	exterior	E	Acc Abs_mes_count_n_3	8
(30,40]	exterior	E	Acc Abs_mes_count_n_3	13
(30,40]	exterior	E	Acc Abs_mes_count_n_3	13
(30,40]	exterior	E	Acc Abs_mes_count_n_3	8
(50,60]	exterior	E	Acc Abs_mes_count_n_3	3
(50,60]	exterior	E	Acc Abs_mes_count_n_3	2
(50,60]	exterior	E	Acc Abs_mes_count_n_3	8
(50,60]	exterior	E	Acc Abs_mes_count_n_3	2
(50,60]	exterior	E	Acc Abs_mes_count_n_3	2
(50,60]	exterior	E	Acc Abs_mes_count_n_3	2
(50,60]	exterior	E	Acc Abs_mes_count_n_3	5
(50,60]	exterior	E	Acc Abs_mes_count_n_3	3
(50,60]	exterior	E	Acc Abs_mes_count_n_3	4
(50,60]	exterior	E	Acc Abs_mes_count_n_3	4
(50,60]	exterior	E	Acc Abs_mes_count_n_3	1
(50,60]	exterior	E	Acc Abs_mes_count_n_3	5
(50,60]	exterior	E	Acc Abs_mes_count_n_3	1
(50,60]	exterior	E	Acc Abs_mes_count_n_3	2
(50,60]	exterior	E	Acc Abs_mes_count_n_3	4
(50,60]	exterior	E	Acc Abs_mes_count_n_3	10
(70,80]	exterior	E	Acc Abs_mes_count_n_3	1
(70,80]	exterior	E	Acc Abs_mes_count_n_3	1
(70,80]	exterior	E	Acc Abs_mes_count_n_3	1
(70,80]	exterior	E	Acc Abs_mes_count_n_3	2
(70,80]	exterior	E	Acc Abs_mes_count_n_3	2
(70,80]	exterior	E	Acc Abs_mes_count_n_3	1
(90,100]	exterior	E	Acc Abs_mes_count_n_3	1
(90,100]	exterior	E	Acc Abs_mes_count_n_3	1
(90,100]	exterior	E	Acc Abs_mes_count_n_3	1
(20,30]	interior	F	Acc Abs_mes_count_n_3	17
(20,30]	interior	F	Acc Abs_mes_count_n_3	13
(20,30]	interior	F	Acc Abs_mes_count_n_3	22
(20,30]	interior	F	Acc Abs_mes_count_n_3	14
(20,30]	interior	F	Acc Abs_mes_count_n_3	16
(20,30]	interior	F	Acc Abs_mes_count_n_3	17
(20,30]	interior	F	Acc Abs_mes_count_n_3	12
(20,30]	interior	F	Acc Abs_mes_count_n_3	17
(20,30]	interior	F	Acc Abs_mes_count_n_3	20
(20,30]	interior	F	Acc Abs_mes_count_n_3	15
(20,30]	interior	F	Acc Abs_mes_count_n_3	13
(20,30]	interior	F	Acc Abs_mes_count_n_3	22
(20,30]	interior	F	Acc Abs_mes_count_n_3	23
(20,30]	interior	F	Acc Abs_mes_count_n_3	16
(20,30]	interior	F	Acc Abs_mes_count_n_3	14
(20,30]	interior	F	Acc Abs_mes_count_n_3	16
(40,50]	interior	F	Acc Abs_mes_count_n_3	9
(40,50]	interior	F	Acc Abs_mes_count_n_3	13
(40,50]	interior	F	Acc Abs_mes_count_n_3	8
(40,50]	interior	F	Acc Abs_mes_count_n_3	9
(40,50]	interior	F	Acc Abs_mes_count_n_3	11
(40,50]	interior	F	Acc Abs_mes_count_n_3	11
(40,50]	interior	F	Acc Abs_mes_count_n_3	7
(40,50]	interior	F	Acc Abs_mes_count_n_3	11
(40,50]	interior	F	Acc Abs_mes_count_n_3	7
(40,50]	interior	F	Acc Abs_mes_count_n_3	12
(40,50]	interior	F	Acc Abs_mes_count_n_3	11
(40,50]	interior	F	Acc Abs_mes_count_n_3	9
(40,50]	interior	F	Acc Abs_mes_count_n_3	8
(40,50]	interior	F	Acc Abs_mes_count_n_3	2
(40,50]	interior	F	Acc Abs_mes_count_n_3	11
(40,50]	interior	F	Acc Abs_mes_count_n_3	11
(70,80]	interior	F	Acc Abs_mes_count_n_3	3
(70,80]	interior	F	Acc Abs_mes_count_n_3	3
(70,80]	interior	F	Acc Abs_mes_count_n_3	2
(70,80]	interior	F	Acc Abs_mes_count_n_3	7
(70,80]	interior	F	Acc Abs_mes_count_n_3	3
(70,80]	interior	F	Acc Abs_mes_count_n_3	1
(70,80]	interior	F	Acc Abs_mes_count_n_3	6
(70,80]	interior	F	Acc Abs_mes_count_n_3	2
(70,80]	interior	F	Acc Abs_mes_count_n_3	2
(70,80]	interior	F	Acc Abs_mes_count_n_3	5
(70,80]	interior	F	Acc Abs_mes_count_n_3	2
(70,80]	interior	F	Acc Abs_mes_count_n_3	5
(70,80]	interior	F	Acc Abs_mes_count_n_3	3
(70,80]	interior	F	Acc Abs_mes_count_n_3	2
(70,80]	interior	F	Acc Abs_mes_count_n_3	5
(70,80]	interior	F	Acc Abs_mes_count_n_3	3
(90,100]	interior	F	Acc Abs_mes_count_n_3	1
(90,100]	interior	F	Acc Abs_mes_count_n_3	3
(90,100]	interior	F	Acc Abs_mes_count_n_3	2
(90,100]	interior	F	Acc Abs_mes_count_n_3	1
(90,100]	interior	F	Acc Abs_mes_count_n_3	2
(90,100]	interior	F	Acc Abs_mes_count_n_3	3
(90,100]	interior	F	Acc Abs_mes_count_n_3	1
(90,100]	interior	F	Acc Abs_mes_count_n_3	2
(90,100]	interior	F	Acc Abs_mes_count_n_3	1
(90,100]	interior	F	Acc Abs_mes_count_n_3	2
(20,30]	exterior	G	Acc Abs_mes_count_n_3	24
(20,30]	exterior	G	Acc Abs_mes_count_n_3	18
(20,30]	exterior	G	Acc Abs_mes_count_n_3	15
(20,30]	exterior	G	Acc Abs_mes_count_n_3	17
(20,30]	exterior	G	Acc Abs_mes_count_n_3	14
(20,30]	exterior	G	Acc Abs_mes_count_n_3	14
(20,30]	exterior	G	Acc Abs_mes_count_n_3	18
(20,30]	exterior	G	Acc Abs_mes_count_n_3	16
(20,30]	exterior	G	Acc Abs_mes_count_n_3	15
(20,30]	exterior	G	Acc Abs_mes_count_n_3	22
(20,30]	exterior	G	Acc Abs_mes_count_n_3	16
(20,30]	exterior	G	Acc Abs_mes_count_n_3	18
(20,30]	exterior	G	Acc Abs_mes_count_n_3	11
(20,30]	exterior	G	Acc Abs_mes_count_n_3	22
(20,30]	exterior	G	Acc Abs_mes_count_n_3	20
(20,30]	exterior	G	Acc Abs_mes_count_n_3	18
(20,30]	exterior	G	Acc Abs_mes_count_n_3	20
(20,30]	exterior	G	Acc Abs_mes_count_n_3	17
(40,50]	exterior	G	Acc Abs_mes_count_n_3	8
(40,50]	exterior	G	Acc Abs_mes_count_n_3	9
(40,50]	exterior	G	Acc Abs_mes_count_n_3	8
(40,50]	exterior	G	Acc Abs_mes_count_n_3	3
(40,50]	exterior	G	Acc Abs_mes_count_n_3	8
(40,50]	exterior	G	Acc Abs_mes_count_n_3	6
(40,50]	exterior	G	Acc Abs_mes_count_n_3	7
(40,50]	exterior	G	Acc Abs_mes_count_n_3	4
(40,50]	exterior	G	Acc Abs_mes_count_n_3	4
(40,50]	exterior	G	Acc Abs_mes_count_n_3	7
(40,50]	exterior	G	Acc Abs_mes_count_n_3	2
(40,50]	exterior	G	Acc Abs_mes_count_n_3	10
(40,50]	exterior	G	Acc Abs_mes_count_n_3	8
(40,50]	exterior	G	Acc Abs_mes_count_n_3	6
(40,50]	exterior	G	Acc Abs_mes_count_n_3	6
(40,50]	exterior	G	Acc Abs_mes_count_n_3	7
(40,50]	exterior	G	Acc Abs_mes_count_n_3	5
(40,50]	exterior	G	Acc Abs_mes_count_n_3	2
(70,80]	exterior	G	Acc Abs_mes_count_n_3	2
(70,80]	exterior	G	Acc Abs_mes_count_n_3	2
(70,80]	exterior	G	Acc Abs_mes_count_n_3	3
(70,80]	exterior	G	Acc Abs_mes_count_n_3	1
(70,80]	exterior	G	Acc Abs_mes_count_n_3	3
(70,80]	exterior	G	Acc Abs_mes_count_n_3	2
(70,80]	exterior	G	Acc Abs_mes_count_n_3	2
(70,80]	exterior	G	Acc Abs_mes_count_n_3	1
(70,80]	exterior	G	Acc Abs_mes_count_n_3	3
(70,80]	exterior	G	Acc Abs_mes_count_n_3	1
(70,80]	exterior	G	Acc Abs_mes_count_n_3	1
(70,80]	exterior	G	Acc Abs_mes_count_n_3	5
(70,80]	exterior	G	Acc Abs_mes_count_n_3	2
(70,80]	exterior	G	Acc Abs_mes_count_n_3	1
(90,100]	exterior	G	Acc Abs_mes_count_n_3	1
(90,100]	exterior	G	Acc Abs_mes_count_n_3	1
(90,100]	exterior	G	Acc Abs_mes_count_n_3	1
(30,40]	exterior	H	Acc Abs_mes_count_n_3	13
(30,40]	exterior	H	Acc Abs_mes_count_n_3	14
(30,40]	exterior	H	Acc Abs_mes_count_n_3	7
(60,70]	exterior	H	Acc Abs_mes_count_n_3	19
(60,70]	exterior	H	Acc Abs_mes_count_n_3	7
(60,70]	exterior	H	Acc Abs_mes_count_n_3	6
(90,100]	exterior	H	Acc Abs_mes_count_n_3	2
(90,100]	exterior	H	Acc Abs_mes_count_n_3	8
(130,140]	exterior	H	Acc Abs_mes_count_n_3	1
(20,30]	exterior	I	Acc Abs_mes_count_n_3	15
(20,30]	exterior	I	Acc Abs_mes_count_n_3	12
(20,30]	exterior	I	Acc Abs_mes_count_n_3	19
(20,30]	exterior	I	Acc Abs_mes_count_n_3	20
(20,30]	exterior	I	Acc Abs_mes_count_n_3	30
(20,30]	exterior	I	Acc Abs_mes_count_n_3	12
(20,30]	exterior	I	Acc Abs_mes_count_n_3	18
(20,30]	exterior	I	Acc Abs_mes_count_n_3	10
(20,30]	exterior	I	Acc Abs_mes_count_n_3	17
(20,30]	exterior	I	Acc Abs_mes_count_n_3	16
(20,30]	exterior	I	Acc Abs_mes_count_n_3	17
(20,30]	exterior	I	Acc Abs_mes_count_n_3	14
(20,30]	exterior	I	Acc Abs_mes_count_n_3	19
(20,30]	exterior	I	Acc Abs_mes_count_n_3	15
(20,30]	exterior	I	Acc Abs_mes_count_n_3	11
(20,30]	exterior	I	Acc Abs_mes_count_n_3	16
(20,30]	exterior	I	Acc Abs_mes_count_n_3	10
(20,30]	exterior	I	Acc Abs_mes_count_n_3	11
(40,50]	exterior	I	Acc Abs_mes_count_n_3	9
(40,50]	exterior	I	Acc Abs_mes_count_n_3	10
(40,50]	exterior	I	Acc Abs_mes_count_n_3	10
(40,50]	exterior	I	Acc Abs_mes_count_n_3	5
(40,50]	exterior	I	Acc Abs_mes_count_n_3	7
(40,50]	exterior	I	Acc Abs_mes_count_n_3	7
(40,50]	exterior	I	Acc Abs_mes_count_n_3	8
(40,50]	exterior	I	Acc Abs_mes_count_n_3	5
(40,50]	exterior	I	Acc Abs_mes_count_n_3	8
(40,50]	exterior	I	Acc Abs_mes_count_n_3	3
(40,50]	exterior	I	Acc Abs_mes_count_n_3	6
(40,50]	exterior	I	Acc Abs_mes_count_n_3	4
(40,50]	exterior	I	Acc Abs_mes_count_n_3	8
(40,50]	exterior	I	Acc Abs_mes_count_n_3	3
(40,50]	exterior	I	Acc Abs_mes_count_n_3	1
(40,50]	exterior	I	Acc Abs_mes_count_n_3	8
(40,50]	exterior	I	Acc Abs_mes_count_n_3	8
(40,50]	exterior	I	Acc Abs_mes_count_n_3	11
(70,80]	exterior	I	Acc Abs_mes_count_n_3	1
(70,80]	exterior	I	Acc Abs_mes_count_n_3	3
(70,80]	exterior	I	Acc Abs_mes_count_n_3	4
(70,80]	exterior	I	Acc Abs_mes_count_n_3	3
(70,80]	exterior	I	Acc Abs_mes_count_n_3	1
(70,80]	exterior	I	Acc Abs_mes_count_n_3	1
(70,80]	exterior	I	Acc Abs_mes_count_n_3	4
(70,80]	exterior	I	Acc Abs_mes_count_n_3	5
(70,80]	exterior	I	Acc Abs_mes_count_n_3	4
(70,80]	exterior	I	Acc Abs_mes_count_n_3	2
(70,80]	exterior	I	Acc Abs_mes_count_n_3	5
(70,80]	exterior	I	Acc Abs_mes_count_n_3	4
(70,80]	exterior	I	Acc Abs_mes_count_n_3	1
(70,80]	exterior	I	Acc Abs_mes_count_n_3	4
(70,80]	exterior	I	Acc Abs_mes_count_n_3	3
(70,80]	exterior	I	Acc Abs_mes_count_n_3	3
(70,80]	exterior	I	Acc Abs_mes_count_n_3	1
(90,100]	exterior	I	Acc Abs_mes_count_n_3	1
(90,100]	exterior	I	Acc Abs_mes_count_n_3	2
(90,100]	exterior	I	Acc Abs_mes_count_n_3	2
(90,100]	exterior	I	Acc Abs_mes_count_n_3	1
(10,20]	exterior	A	Dec Abs_mes_count_n_-2	15
(10,20]	exterior	A	Dec Abs_mes_count_n_-2	23
(10,20]	exterior	A	Dec Abs_mes_count_n_-2	10
(10,20]	exterior	A	Dec Abs_mes_count_n_-2	6
(10,20]	exterior	A	Dec Abs_mes_count_n_-2	9
(10,20]	exterior	A	Dec Abs_mes_count_n_-2	6
(10,20]	exterior	A	Dec Abs_mes_count_n_-2	8
(10,20]	exterior	A	Dec Abs_mes_count_n_-2	10
(10,20]	exterior	A	Dec Abs_mes_count_n_-2	10
(10,20]	exterior	A	Dec Abs_mes_count_n_-2	15
(10,20]	exterior	A	Dec Abs_mes_count_n_-2	9
(10,20]	exterior	A	Dec Abs_mes_count_n_-2	9
(10,20]	exterior	A	Dec Abs_mes_count_n_-2	10
(10,20]	exterior	A	Dec Abs_mes_count_n_-2	11
(10,20]	exterior	A	Dec Abs_mes_count_n_-2	12
(10,20]	exterior	A	Dec Abs_mes_count_n_-2	13
(10,20]	exterior	A	Dec Abs_mes_count_n_-2	16
(10,20]	exterior	A	Dec Abs_mes_count_n_-2	9
(20,30]	exterior	A	Dec Abs_mes_count_n_-2	18
(20,30]	exterior	A	Dec Abs_mes_count_n_-2	14
(20,30]	exterior	A	Dec Abs_mes_count_n_-2	19
(20,30]	exterior	A	Dec Abs_mes_count_n_-2	14
(20,30]	exterior	A	Dec Abs_mes_count_n_-2	9
(20,30]	exterior	A	Dec Abs_mes_count_n_-2	14
(20,30]	exterior	A	Dec Abs_mes_count_n_-2	7
(20,30]	exterior	A	Dec Abs_mes_count_n_-2	12
(20,30]	exterior	A	Dec Abs_mes_count_n_-2	9
(20,30]	exterior	A	Dec Abs_mes_count_n_-2	6
(20,30]	exterior	A	Dec Abs_mes_count_n_-2	10
(20,30]	exterior	A	Dec Abs_mes_count_n_-2	19
(20,30]	exterior	A	Dec Abs_mes_count_n_-2	8
(20,30]	exterior	A	Dec Abs_mes_count_n_-2	12
(20,30]	exterior	A	Dec Abs_mes_count_n_-2	14
(20,30]	exterior	A	Dec Abs_mes_count_n_-2	15
(20,30]	exterior	A	Dec Abs_mes_count_n_-2	15
(20,30]	exterior	A	Dec Abs_mes_count_n_-2	9
(40,50]	exterior	A	Dec Abs_mes_count_n_-2	12
(40,50]	exterior	A	Dec Abs_mes_count_n_-2	14
(40,50]	exterior	A	Dec Abs_mes_count_n_-2	9
(40,50]	exterior	A	Dec Abs_mes_count_n_-2	15
(40,50]	exterior	A	Dec Abs_mes_count_n_-2	12
(40,50]	exterior	A	Dec Abs_mes_count_n_-2	14
(40,50]	exterior	A	Dec Abs_mes_count_n_-2	5
(40,50]	exterior	A	Dec Abs_mes_count_n_-2	7
(40,50]	exterior	A	Dec Abs_mes_count_n_-2	14
(40,50]	exterior	A	Dec Abs_mes_count_n_-2	9
(40,50]	exterior	A	Dec Abs_mes_count_n_-2	10
(40,50]	exterior	A	Dec Abs_mes_count_n_-2	11
(40,50]	exterior	A	Dec Abs_mes_count_n_-2	13
(40,50]	exterior	A	Dec Abs_mes_count_n_-2	10
(40,50]	exterior	A	Dec Abs_mes_count_n_-2	19
(40,50]	exterior	A	Dec Abs_mes_count_n_-2	13
(40,50]	exterior	A	Dec Abs_mes_count_n_-2	6
(40,50]	exterior	A	Dec Abs_mes_count_n_-2	12
(50,60]	exterior	A	Dec Abs_mes_count_n_-2	8
(50,60]	exterior	A	Dec Abs_mes_count_n_-2	14
(50,60]	exterior	A	Dec Abs_mes_count_n_-2	11
(50,60]	exterior	A	Dec Abs_mes_count_n_-2	15
(50,60]	exterior	A	Dec Abs_mes_count_n_-2	8
(50,60]	exterior	A	Dec Abs_mes_count_n_-2	7
(50,60]	exterior	A	Dec Abs_mes_count_n_-2	8
(50,60]	exterior	A	Dec Abs_mes_count_n_-2	10
(50,60]	exterior	A	Dec Abs_mes_count_n_-2	6
(50,60]	exterior	A	Dec Abs_mes_count_n_-2	9
(50,60]	exterior	A	Dec Abs_mes_count_n_-2	8
(50,60]	exterior	A	Dec Abs_mes_count_n_-2	5
(50,60]	exterior	A	Dec Abs_mes_count_n_-2	8
(50,60]	exterior	A	Dec Abs_mes_count_n_-2	4
(50,60]	exterior	A	Dec Abs_mes_count_n_-2	7
(50,60]	exterior	A	Dec Abs_mes_count_n_-2	7
(50,60]	exterior	A	Dec Abs_mes_count_n_-2	11
(50,60]	exterior	A	Dec Abs_mes_count_n_-2	10
(70,80]	exterior	A	Dec Abs_mes_count_n_-2	3
(70,80]	exterior	A	Dec Abs_mes_count_n_-2	5
(70,80]	exterior	A	Dec Abs_mes_count_n_-2	4
(70,80]	exterior	A	Dec Abs_mes_count_n_-2	3
(70,80]	exterior	A	Dec Abs_mes_count_n_-2	3
(70,80]	exterior	A	Dec Abs_mes_count_n_-2	3
(70,80]	exterior	A	Dec Abs_mes_count_n_-2	3
(70,80]	exterior	A	Dec Abs_mes_count_n_-2	5
(70,80]	exterior	A	Dec Abs_mes_count_n_-2	5
(70,80]	exterior	A	Dec Abs_mes_count_n_-2	3
(70,80]	exterior	A	Dec Abs_mes_count_n_-2	4
(70,80]	exterior	A	Dec Abs_mes_count_n_-2	1
(70,80]	exterior	A	Dec Abs_mes_count_n_-2	1
(70,80]	exterior	A	Dec Abs_mes_count_n_-2	2
(70,80]	exterior	A	Dec Abs_mes_count_n_-2	2
(70,80]	exterior	A	Dec Abs_mes_count_n_-2	6
(70,80]	exterior	A	Dec Abs_mes_count_n_-2	5
(80,90]	exterior	A	Dec Abs_mes_count_n_-2	1
(80,90]	exterior	A	Dec Abs_mes_count_n_-2	1
(80,90]	exterior	A	Dec Abs_mes_count_n_-2	1
(80,90]	exterior	A	Dec Abs_mes_count_n_-2	1
(80,90]	exterior	A	Dec Abs_mes_count_n_-2	4
(80,90]	exterior	A	Dec Abs_mes_count_n_-2	1
(80,90]	exterior	A	Dec Abs_mes_count_n_-2	1
(80,90]	exterior	A	Dec Abs_mes_count_n_-2	1
(80,90]	exterior	A	Dec Abs_mes_count_n_-2	2
(90,100]	exterior	A	Dec Abs_mes_count_n_-2	1
(90,100]	exterior	A	Dec Abs_mes_count_n_-2	1
(90,100]	exterior	A	Dec Abs_mes_count_n_-2	1
(90,100]	exterior	A	Dec Abs_mes_count_n_-2	1
(10,20]	exterior	B	Dec Abs_mes_count_n_-2	7
(10,20]	exterior	B	Dec Abs_mes_count_n_-2	10
(10,20]	exterior	B	Dec Abs_mes_count_n_-2	11
(10,20]	exterior	B	Dec Abs_mes_count_n_-2	17
(10,20]	exterior	B	Dec Abs_mes_count_n_-2	17
(10,20]	exterior	B	Dec Abs_mes_count_n_-2	11
(10,20]	exterior	B	Dec Abs_mes_count_n_-2	8
(10,20]	exterior	B	Dec Abs_mes_count_n_-2	13
(10,20]	exterior	B	Dec Abs_mes_count_n_-2	12
(10,20]	exterior	B	Dec Abs_mes_count_n_-2	11
(10,20]	exterior	B	Dec Abs_mes_count_n_-2	8
(10,20]	exterior	B	Dec Abs_mes_count_n_-2	7
(10,20]	exterior	B	Dec Abs_mes_count_n_-2	5
(10,20]	exterior	B	Dec Abs_mes_count_n_-2	8
(10,20]	exterior	B	Dec Abs_mes_count_n_-2	17
(10,20]	exterior	B	Dec Abs_mes_count_n_-2	5
(10,20]	exterior	B	Dec Abs_mes_count_n_-2	7
(10,20]	exterior	B	Dec Abs_mes_count_n_-2	11
(20,30]	exterior	B	Dec Abs_mes_count_n_-2	10
(20,30]	exterior	B	Dec Abs_mes_count_n_-2	11
(20,30]	exterior	B	Dec Abs_mes_count_n_-2	18
(20,30]	exterior	B	Dec Abs_mes_count_n_-2	11
(20,30]	exterior	B	Dec Abs_mes_count_n_-2	12
(20,30]	exterior	B	Dec Abs_mes_count_n_-2	9
(20,30]	exterior	B	Dec Abs_mes_count_n_-2	12
(20,30]	exterior	B	Dec Abs_mes_count_n_-2	11
(20,30]	exterior	B	Dec Abs_mes_count_n_-2	12
(20,30]	exterior	B	Dec Abs_mes_count_n_-2	14
(20,30]	exterior	B	Dec Abs_mes_count_n_-2	7
(20,30]	exterior	B	Dec Abs_mes_count_n_-2	5
(20,30]	exterior	B	Dec Abs_mes_count_n_-2	6
(20,30]	exterior	B	Dec Abs_mes_count_n_-2	11
(20,30]	exterior	B	Dec Abs_mes_count_n_-2	16
(20,30]	exterior	B	Dec Abs_mes_count_n_-2	15
(20,30]	exterior	B	Dec Abs_mes_count_n_-2	7
(20,30]	exterior	B	Dec Abs_mes_count_n_-2	10
(30,40]	exterior	B	Dec Abs_mes_count_n_-2	8
(30,40]	exterior	B	Dec Abs_mes_count_n_-2	12
(30,40]	exterior	B	Dec Abs_mes_count_n_-2	9
(30,40]	exterior	B	Dec Abs_mes_count_n_-2	12
(30,40]	exterior	B	Dec Abs_mes_count_n_-2	9
(30,40]	exterior	B	Dec Abs_mes_count_n_-2	10
(30,40]	exterior	B	Dec Abs_mes_count_n_-2	9
(30,40]	exterior	B	Dec Abs_mes_count_n_-2	8
(30,40]	exterior	B	Dec Abs_mes_count_n_-2	12
(30,40]	exterior	B	Dec Abs_mes_count_n_-2	12
(30,40]	exterior	B	Dec Abs_mes_count_n_-2	11
(30,40]	exterior	B	Dec Abs_mes_count_n_-2	10
(30,40]	exterior	B	Dec Abs_mes_count_n_-2	11
(30,40]	exterior	B	Dec Abs_mes_count_n_-2	9
(30,40]	exterior	B	Dec Abs_mes_count_n_-2	10
(30,40]	exterior	B	Dec Abs_mes_count_n_-2	7
(30,40]	exterior	B	Dec Abs_mes_count_n_-2	8
(30,40]	exterior	B	Dec Abs_mes_count_n_-2	9
(40,50]	exterior	B	Dec Abs_mes_count_n_-2	11
(40,50]	exterior	B	Dec Abs_mes_count_n_-2	13
(40,50]	exterior	B	Dec Abs_mes_count_n_-2	9
(40,50]	exterior	B	Dec Abs_mes_count_n_-2	11
(40,50]	exterior	B	Dec Abs_mes_count_n_-2	7
(40,50]	exterior	B	Dec Abs_mes_count_n_-2	7
(40,50]	exterior	B	Dec Abs_mes_count_n_-2	12
(40,50]	exterior	B	Dec Abs_mes_count_n_-2	12
(40,50]	exterior	B	Dec Abs_mes_count_n_-2	7
(40,50]	exterior	B	Dec Abs_mes_count_n_-2	8
(40,50]	exterior	B	Dec Abs_mes_count_n_-2	5
(40,50]	exterior	B	Dec Abs_mes_count_n_-2	12
(40,50]	exterior	B	Dec Abs_mes_count_n_-2	10
(40,50]	exterior	B	Dec Abs_mes_count_n_-2	14
(40,50]	exterior	B	Dec Abs_mes_count_n_-2	15
(40,50]	exterior	B	Dec Abs_mes_count_n_-2	11
(40,50]	exterior	B	Dec Abs_mes_count_n_-2	4
(40,50]	exterior	B	Dec Abs_mes_count_n_-2	10
(60,70]	exterior	B	Dec Abs_mes_count_n_-2	4
(60,70]	exterior	B	Dec Abs_mes_count_n_-2	5
(60,70]	exterior	B	Dec Abs_mes_count_n_-2	9
(60,70]	exterior	B	Dec Abs_mes_count_n_-2	6
(60,70]	exterior	B	Dec Abs_mes_count_n_-2	5
(60,70]	exterior	B	Dec Abs_mes_count_n_-2	3
(60,70]	exterior	B	Dec Abs_mes_count_n_-2	8
(60,70]	exterior	B	Dec Abs_mes_count_n_-2	3
(60,70]	exterior	B	Dec Abs_mes_count_n_-2	3
(60,70]	exterior	B	Dec Abs_mes_count_n_-2	5
(60,70]	exterior	B	Dec Abs_mes_count_n_-2	7
(60,70]	exterior	B	Dec Abs_mes_count_n_-2	7
(60,70]	exterior	B	Dec Abs_mes_count_n_-2	7
(60,70]	exterior	B	Dec Abs_mes_count_n_-2	9
(60,70]	exterior	B	Dec Abs_mes_count_n_-2	8
(60,70]	exterior	B	Dec Abs_mes_count_n_-2	3
(60,70]	exterior	B	Dec Abs_mes_count_n_-2	6
(60,70]	exterior	B	Dec Abs_mes_count_n_-2	5
(70,80]	exterior	B	Dec Abs_mes_count_n_-2	3
(70,80]	exterior	B	Dec Abs_mes_count_n_-2	2
(70,80]	exterior	B	Dec Abs_mes_count_n_-2	1
(70,80]	exterior	B	Dec Abs_mes_count_n_-2	3
(70,80]	exterior	B	Dec Abs_mes_count_n_-2	7
(70,80]	exterior	B	Dec Abs_mes_count_n_-2	2
(70,80]	exterior	B	Dec Abs_mes_count_n_-2	1
(70,80]	exterior	B	Dec Abs_mes_count_n_-2	2
(70,80]	exterior	B	Dec Abs_mes_count_n_-2	5
(70,80]	exterior	B	Dec Abs_mes_count_n_-2	2
(70,80]	exterior	B	Dec Abs_mes_count_n_-2	2
(70,80]	exterior	B	Dec Abs_mes_count_n_-2	3
(70,80]	exterior	B	Dec Abs_mes_count_n_-2	5
(70,80]	exterior	B	Dec Abs_mes_count_n_-2	2
(70,80]	exterior	B	Dec Abs_mes_count_n_-2	1
(70,80]	exterior	B	Dec Abs_mes_count_n_-2	2
(70,80]	exterior	B	Dec Abs_mes_count_n_-2	5
(80,90]	exterior	B	Dec Abs_mes_count_n_-2	2
(80,90]	exterior	B	Dec Abs_mes_count_n_-2	1
(80,90]	exterior	B	Dec Abs_mes_count_n_-2	1
(80,90]	exterior	B	Dec Abs_mes_count_n_-2	1
(80,90]	exterior	B	Dec Abs_mes_count_n_-2	1
(80,90]	exterior	B	Dec Abs_mes_count_n_-2	1
(80,90]	exterior	B	Dec Abs_mes_count_n_-2	1
(80,90]	exterior	B	Dec Abs_mes_count_n_-2	1
(90,100]	exterior	B	Dec Abs_mes_count_n_-2	1
(90,100]	exterior	B	Dec Abs_mes_count_n_-2	1
(90,100]	exterior	B	Dec Abs_mes_count_n_-2	1
(10,20]	interior	C	Dec Abs_mes_count_n_-2	10
(10,20]	interior	C	Dec Abs_mes_count_n_-2	11
(10,20]	interior	C	Dec Abs_mes_count_n_-2	6
(10,20]	interior	C	Dec Abs_mes_count_n_-2	8
(10,20]	interior	C	Dec Abs_mes_count_n_-2	15
(10,20]	interior	C	Dec Abs_mes_count_n_-2	9
(10,20]	interior	C	Dec Abs_mes_count_n_-2	10
(10,20]	interior	C	Dec Abs_mes_count_n_-2	8
(10,20]	interior	C	Dec Abs_mes_count_n_-2	13
(10,20]	interior	C	Dec Abs_mes_count_n_-2	8
(10,20]	interior	C	Dec Abs_mes_count_n_-2	7
(10,20]	interior	C	Dec Abs_mes_count_n_-2	6
(10,20]	interior	C	Dec Abs_mes_count_n_-2	9
(10,20]	interior	C	Dec Abs_mes_count_n_-2	13
(10,20]	interior	C	Dec Abs_mes_count_n_-2	15
(10,20]	interior	C	Dec Abs_mes_count_n_-2	11
(10,20]	interior	C	Dec Abs_mes_count_n_-2	7
(10,20]	interior	C	Dec Abs_mes_count_n_-2	12
(20,30]	interior	C	Dec Abs_mes_count_n_-2	10
(20,30]	interior	C	Dec Abs_mes_count_n_-2	15
(20,30]	interior	C	Dec Abs_mes_count_n_-2	10
(20,30]	interior	C	Dec Abs_mes_count_n_-2	8
(20,30]	interior	C	Dec Abs_mes_count_n_-2	6
(20,30]	interior	C	Dec Abs_mes_count_n_-2	12
(20,30]	interior	C	Dec Abs_mes_count_n_-2	13
(20,30]	interior	C	Dec Abs_mes_count_n_-2	12
(20,30]	interior	C	Dec Abs_mes_count_n_-2	7
(20,30]	interior	C	Dec Abs_mes_count_n_-2	8
(20,30]	interior	C	Dec Abs_mes_count_n_-2	8
(20,30]	interior	C	Dec Abs_mes_count_n_-2	12
(20,30]	interior	C	Dec Abs_mes_count_n_-2	5
(20,30]	interior	C	Dec Abs_mes_count_n_-2	12
(20,30]	interior	C	Dec Abs_mes_count_n_-2	11
(20,30]	interior	C	Dec Abs_mes_count_n_-2	10
(20,30]	interior	C	Dec Abs_mes_count_n_-2	8
(20,30]	interior	C	Dec Abs_mes_count_n_-2	9
(40,50]	interior	C	Dec Abs_mes_count_n_-2	10
(40,50]	interior	C	Dec Abs_mes_count_n_-2	7
(40,50]	interior	C	Dec Abs_mes_count_n_-2	8
(40,50]	interior	C	Dec Abs_mes_count_n_-2	8
(40,50]	interior	C	Dec Abs_mes_count_n_-2	10
(40,50]	interior	C	Dec Abs_mes_count_n_-2	9
(40,50]	interior	C	Dec Abs_mes_count_n_-2	6
(40,50]	interior	C	Dec Abs_mes_count_n_-2	11
(40,50]	interior	C	Dec Abs_mes_count_n_-2	16
(40,50]	interior	C	Dec Abs_mes_count_n_-2	6
(40,50]	interior	C	Dec Abs_mes_count_n_-2	11
(40,50]	interior	C	Dec Abs_mes_count_n_-2	16
(40,50]	interior	C	Dec Abs_mes_count_n_-2	13
(40,50]	interior	C	Dec Abs_mes_count_n_-2	7
(40,50]	interior	C	Dec Abs_mes_count_n_-2	11
(40,50]	interior	C	Dec Abs_mes_count_n_-2	4
(40,50]	interior	C	Dec Abs_mes_count_n_-2	8
(40,50]	interior	C	Dec Abs_mes_count_n_-2	12
(50,60]	interior	C	Dec Abs_mes_count_n_-2	5
(50,60]	interior	C	Dec Abs_mes_count_n_-2	9
(50,60]	interior	C	Dec Abs_mes_count_n_-2	10
(50,60]	interior	C	Dec Abs_mes_count_n_-2	8
(50,60]	interior	C	Dec Abs_mes_count_n_-2	11
(50,60]	interior	C	Dec Abs_mes_count_n_-2	9
(50,60]	interior	C	Dec Abs_mes_count_n_-2	3
(50,60]	interior	C	Dec Abs_mes_count_n_-2	6
(50,60]	interior	C	Dec Abs_mes_count_n_-2	4
(50,60]	interior	C	Dec Abs_mes_count_n_-2	7
(50,60]	interior	C	Dec Abs_mes_count_n_-2	9
(50,60]	interior	C	Dec Abs_mes_count_n_-2	7
(50,60]	interior	C	Dec Abs_mes_count_n_-2	9
(50,60]	interior	C	Dec Abs_mes_count_n_-2	10
(50,60]	interior	C	Dec Abs_mes_count_n_-2	11
(50,60]	interior	C	Dec Abs_mes_count_n_-2	11
(50,60]	interior	C	Dec Abs_mes_count_n_-2	7
(50,60]	interior	C	Dec Abs_mes_count_n_-2	11
(60,70]	interior	C	Dec Abs_mes_count_n_-2	3
(60,70]	interior	C	Dec Abs_mes_count_n_-2	4
(60,70]	interior	C	Dec Abs_mes_count_n_-2	1
(60,70]	interior	C	Dec Abs_mes_count_n_-2	4
(60,70]	interior	C	Dec Abs_mes_count_n_-2	2
(60,70]	interior	C	Dec Abs_mes_count_n_-2	3
(60,70]	interior	C	Dec Abs_mes_count_n_-2	7
(60,70]	interior	C	Dec Abs_mes_count_n_-2	6
(60,70]	interior	C	Dec Abs_mes_count_n_-2	3
(60,70]	interior	C	Dec Abs_mes_count_n_-2	10
(60,70]	interior	C	Dec Abs_mes_count_n_-2	5
(60,70]	interior	C	Dec Abs_mes_count_n_-2	2
(60,70]	interior	C	Dec Abs_mes_count_n_-2	4
(60,70]	interior	C	Dec Abs_mes_count_n_-2	1
(60,70]	interior	C	Dec Abs_mes_count_n_-2	8
(60,70]	interior	C	Dec Abs_mes_count_n_-2	3
(60,70]	interior	C	Dec Abs_mes_count_n_-2	9
(60,70]	interior	C	Dec Abs_mes_count_n_-2	4
(80,90]	interior	C	Dec Abs_mes_count_n_-2	3
(80,90]	interior	C	Dec Abs_mes_count_n_-2	2
(80,90]	interior	C	Dec Abs_mes_count_n_-2	4
(80,90]	interior	C	Dec Abs_mes_count_n_-2	1
(80,90]	interior	C	Dec Abs_mes_count_n_-2	2
(80,90]	interior	C	Dec Abs_mes_count_n_-2	1
(80,90]	interior	C	Dec Abs_mes_count_n_-2	3
(80,90]	interior	C	Dec Abs_mes_count_n_-2	1
(80,90]	interior	C	Dec Abs_mes_count_n_-2	3
(80,90]	interior	C	Dec Abs_mes_count_n_-2	2
(80,90]	interior	C	Dec Abs_mes_count_n_-2	1
(80,90]	interior	C	Dec Abs_mes_count_n_-2	2
(80,90]	interior	C	Dec Abs_mes_count_n_-2	4
(90,100]	interior	C	Dec Abs_mes_count_n_-2	1
(90,100]	interior	C	Dec Abs_mes_count_n_-2	1
(90,100]	interior	C	Dec Abs_mes_count_n_-2	1
(90,100]	interior	C	Dec Abs_mes_count_n_-2	1
(90,100]	interior	C	Dec Abs_mes_count_n_-2	1
(100,110]	interior	C	Dec Abs_mes_count_n_-2	1
(10,20]	exterior	D	Dec Abs_mes_count_n_-2	15
(10,20]	exterior	D	Dec Abs_mes_count_n_-2	14
(10,20]	exterior	D	Dec Abs_mes_count_n_-2	16
(10,20]	exterior	D	Dec Abs_mes_count_n_-2	14
(10,20]	exterior	D	Dec Abs_mes_count_n_-2	13
(10,20]	exterior	D	Dec Abs_mes_count_n_-2	11
(10,20]	exterior	D	Dec Abs_mes_count_n_-2	9
(10,20]	exterior	D	Dec Abs_mes_count_n_-2	14
(10,20]	exterior	D	Dec Abs_mes_count_n_-2	13
(10,20]	exterior	D	Dec Abs_mes_count_n_-2	11
(10,20]	exterior	D	Dec Abs_mes_count_n_-2	11
(10,20]	exterior	D	Dec Abs_mes_count_n_-2	14
(10,20]	exterior	D	Dec Abs_mes_count_n_-2	14
(10,20]	exterior	D	Dec Abs_mes_count_n_-2	8
(30,40]	exterior	D	Dec Abs_mes_count_n_-2	7
(30,40]	exterior	D	Dec Abs_mes_count_n_-2	8
(30,40]	exterior	D	Dec Abs_mes_count_n_-2	7
(30,40]	exterior	D	Dec Abs_mes_count_n_-2	13
(30,40]	exterior	D	Dec Abs_mes_count_n_-2	14
(30,40]	exterior	D	Dec Abs_mes_count_n_-2	12
(30,40]	exterior	D	Dec Abs_mes_count_n_-2	16
(30,40]	exterior	D	Dec Abs_mes_count_n_-2	7
(30,40]	exterior	D	Dec Abs_mes_count_n_-2	21
(30,40]	exterior	D	Dec Abs_mes_count_n_-2	15
(30,40]	exterior	D	Dec Abs_mes_count_n_-2	14
(30,40]	exterior	D	Dec Abs_mes_count_n_-2	12
(30,40]	exterior	D	Dec Abs_mes_count_n_-2	8
(30,40]	exterior	D	Dec Abs_mes_count_n_-2	12
(40,50]	exterior	D	Dec Abs_mes_count_n_-2	18
(40,50]	exterior	D	Dec Abs_mes_count_n_-2	12
(40,50]	exterior	D	Dec Abs_mes_count_n_-2	8
(40,50]	exterior	D	Dec Abs_mes_count_n_-2	8
(40,50]	exterior	D	Dec Abs_mes_count_n_-2	13
(40,50]	exterior	D	Dec Abs_mes_count_n_-2	9
(40,50]	exterior	D	Dec Abs_mes_count_n_-2	15
(40,50]	exterior	D	Dec Abs_mes_count_n_-2	9
(40,50]	exterior	D	Dec Abs_mes_count_n_-2	9
(40,50]	exterior	D	Dec Abs_mes_count_n_-2	8
(40,50]	exterior	D	Dec Abs_mes_count_n_-2	9
(40,50]	exterior	D	Dec Abs_mes_count_n_-2	5
(40,50]	exterior	D	Dec Abs_mes_count_n_-2	6
(40,50]	exterior	D	Dec Abs_mes_count_n_-2	12
(60,70]	exterior	D	Dec Abs_mes_count_n_-2	4
(60,70]	exterior	D	Dec Abs_mes_count_n_-2	7
(60,70]	exterior	D	Dec Abs_mes_count_n_-2	4
(60,70]	exterior	D	Dec Abs_mes_count_n_-2	7
(60,70]	exterior	D	Dec Abs_mes_count_n_-2	6
(60,70]	exterior	D	Dec Abs_mes_count_n_-2	4
(60,70]	exterior	D	Dec Abs_mes_count_n_-2	5
(60,70]	exterior	D	Dec Abs_mes_count_n_-2	7
(60,70]	exterior	D	Dec Abs_mes_count_n_-2	7
(60,70]	exterior	D	Dec Abs_mes_count_n_-2	9
(60,70]	exterior	D	Dec Abs_mes_count_n_-2	4
(60,70]	exterior	D	Dec Abs_mes_count_n_-2	7
(60,70]	exterior	D	Dec Abs_mes_count_n_-2	3
(60,70]	exterior	D	Dec Abs_mes_count_n_-2	5
(80,90]	exterior	D	Dec Abs_mes_count_n_-2	3
(80,90]	exterior	D	Dec Abs_mes_count_n_-2	1
(80,90]	exterior	D	Dec Abs_mes_count_n_-2	5
(80,90]	exterior	D	Dec Abs_mes_count_n_-2	4
(80,90]	exterior	D	Dec Abs_mes_count_n_-2	1
(80,90]	exterior	D	Dec Abs_mes_count_n_-2	1
(80,90]	exterior	D	Dec Abs_mes_count_n_-2	1
(80,90]	exterior	D	Dec Abs_mes_count_n_-2	3
(80,90]	exterior	D	Dec Abs_mes_count_n_-2	1
(80,90]	exterior	D	Dec Abs_mes_count_n_-2	3
(80,90]	exterior	D	Dec Abs_mes_count_n_-2	4
(80,90]	exterior	D	Dec Abs_mes_count_n_-2	2
(80,90]	exterior	D	Dec Abs_mes_count_n_-2	2
(80,90]	exterior	D	Dec Abs_mes_count_n_-2	3
(90,100]	exterior	D	Dec Abs_mes_count_n_-2	2
(90,100]	exterior	D	Dec Abs_mes_count_n_-2	1
(90,100]	exterior	D	Dec Abs_mes_count_n_-2	2
(90,100]	exterior	D	Dec Abs_mes_count_n_-2	1
(90,100]	exterior	D	Dec Abs_mes_count_n_-2	1
(90,100]	exterior	D	Dec Abs_mes_count_n_-2	1
(90,100]	exterior	D	Dec Abs_mes_count_n_-2	1
(10,20]	exterior	E	Dec Abs_mes_count_n_-2	15
(10,20]	exterior	E	Dec Abs_mes_count_n_-2	7
(10,20]	exterior	E	Dec Abs_mes_count_n_-2	11
(10,20]	exterior	E	Dec Abs_mes_count_n_-2	13
(10,20]	exterior	E	Dec Abs_mes_count_n_-2	11
(10,20]	exterior	E	Dec Abs_mes_count_n_-2	8
(10,20]	exterior	E	Dec Abs_mes_count_n_-2	14
(10,20]	exterior	E	Dec Abs_mes_count_n_-2	8
(10,20]	exterior	E	Dec Abs_mes_count_n_-2	13
(10,20]	exterior	E	Dec Abs_mes_count_n_-2	5
(10,20]	exterior	E	Dec Abs_mes_count_n_-2	8
(10,20]	exterior	E	Dec Abs_mes_count_n_-2	14
(10,20]	exterior	E	Dec Abs_mes_count_n_-2	13
(10,20]	exterior	E	Dec Abs_mes_count_n_-2	14
(10,20]	exterior	E	Dec Abs_mes_count_n_-2	11
(10,20]	exterior	E	Dec Abs_mes_count_n_-2	7
(20,30]	exterior	E	Dec Abs_mes_count_n_-2	13
(20,30]	exterior	E	Dec Abs_mes_count_n_-2	6
(20,30]	exterior	E	Dec Abs_mes_count_n_-2	6
(20,30]	exterior	E	Dec Abs_mes_count_n_-2	9
(20,30]	exterior	E	Dec Abs_mes_count_n_-2	7
(20,30]	exterior	E	Dec Abs_mes_count_n_-2	11
(20,30]	exterior	E	Dec Abs_mes_count_n_-2	8
(20,30]	exterior	E	Dec Abs_mes_count_n_-2	11
(20,30]	exterior	E	Dec Abs_mes_count_n_-2	4
(20,30]	exterior	E	Dec Abs_mes_count_n_-2	7
(20,30]	exterior	E	Dec Abs_mes_count_n_-2	14
(20,30]	exterior	E	Dec Abs_mes_count_n_-2	10
(20,30]	exterior	E	Dec Abs_mes_count_n_-2	8
(20,30]	exterior	E	Dec Abs_mes_count_n_-2	9
(20,30]	exterior	E	Dec Abs_mes_count_n_-2	12
(20,30]	exterior	E	Dec Abs_mes_count_n_-2	9
(40,50]	exterior	E	Dec Abs_mes_count_n_-2	9
(40,50]	exterior	E	Dec Abs_mes_count_n_-2	10
(40,50]	exterior	E	Dec Abs_mes_count_n_-2	11
(40,50]	exterior	E	Dec Abs_mes_count_n_-2	11
(40,50]	exterior	E	Dec Abs_mes_count_n_-2	12
(40,50]	exterior	E	Dec Abs_mes_count_n_-2	11
(40,50]	exterior	E	Dec Abs_mes_count_n_-2	13
(40,50]	exterior	E	Dec Abs_mes_count_n_-2	15
(40,50]	exterior	E	Dec Abs_mes_count_n_-2	7
(40,50]	exterior	E	Dec Abs_mes_count_n_-2	12
(40,50]	exterior	E	Dec Abs_mes_count_n_-2	3
(40,50]	exterior	E	Dec Abs_mes_count_n_-2	8
(40,50]	exterior	E	Dec Abs_mes_count_n_-2	7
(40,50]	exterior	E	Dec Abs_mes_count_n_-2	9
(40,50]	exterior	E	Dec Abs_mes_count_n_-2	14
(40,50]	exterior	E	Dec Abs_mes_count_n_-2	4
(50,60]	exterior	E	Dec Abs_mes_count_n_-2	7
(50,60]	exterior	E	Dec Abs_mes_count_n_-2	9
(50,60]	exterior	E	Dec Abs_mes_count_n_-2	11
(50,60]	exterior	E	Dec Abs_mes_count_n_-2	11
(50,60]	exterior	E	Dec Abs_mes_count_n_-2	7
(50,60]	exterior	E	Dec Abs_mes_count_n_-2	4
(50,60]	exterior	E	Dec Abs_mes_count_n_-2	7
(50,60]	exterior	E	Dec Abs_mes_count_n_-2	8
(50,60]	exterior	E	Dec Abs_mes_count_n_-2	11
(50,60]	exterior	E	Dec Abs_mes_count_n_-2	6
(50,60]	exterior	E	Dec Abs_mes_count_n_-2	12
(50,60]	exterior	E	Dec Abs_mes_count_n_-2	8
(50,60]	exterior	E	Dec Abs_mes_count_n_-2	10
(50,60]	exterior	E	Dec Abs_mes_count_n_-2	7
(50,60]	exterior	E	Dec Abs_mes_count_n_-2	12
(50,60]	exterior	E	Dec Abs_mes_count_n_-2	13
(60,70]	exterior	E	Dec Abs_mes_count_n_-2	1
(60,70]	exterior	E	Dec Abs_mes_count_n_-2	5
(60,70]	exterior	E	Dec Abs_mes_count_n_-2	3
(60,70]	exterior	E	Dec Abs_mes_count_n_-2	3
(60,70]	exterior	E	Dec Abs_mes_count_n_-2	5
(60,70]	exterior	E	Dec Abs_mes_count_n_-2	2
(60,70]	exterior	E	Dec Abs_mes_count_n_-2	2
(60,70]	exterior	E	Dec Abs_mes_count_n_-2	3
(60,70]	exterior	E	Dec Abs_mes_count_n_-2	3
(60,70]	exterior	E	Dec Abs_mes_count_n_-2	3
(60,70]	exterior	E	Dec Abs_mes_count_n_-2	1
(60,70]	exterior	E	Dec Abs_mes_count_n_-2	5
(60,70]	exterior	E	Dec Abs_mes_count_n_-2	7
(60,70]	exterior	E	Dec Abs_mes_count_n_-2	1
(60,70]	exterior	E	Dec Abs_mes_count_n_-2	3
(60,70]	exterior	E	Dec Abs_mes_count_n_-2	6
(80,90]	exterior	E	Dec Abs_mes_count_n_-2	1
(80,90]	exterior	E	Dec Abs_mes_count_n_-2	1
(80,90]	exterior	E	Dec Abs_mes_count_n_-2	1
(80,90]	exterior	E	Dec Abs_mes_count_n_-2	1
(80,90]	exterior	E	Dec Abs_mes_count_n_-2	3
(80,90]	exterior	E	Dec Abs_mes_count_n_-2	2
(80,90]	exterior	E	Dec Abs_mes_count_n_-2	1
(80,90]	exterior	E	Dec Abs_mes_count_n_-2	2
(80,90]	exterior	E	Dec Abs_mes_count_n_-2	1
(80,90]	exterior	E	Dec Abs_mes_count_n_-2	3
(80,90]	exterior	E	Dec Abs_mes_count_n_-2	1
(90,100]	exterior	E	Dec Abs_mes_count_n_-2	1
(90,100]	exterior	E	Dec Abs_mes_count_n_-2	1
(90,100]	exterior	E	Dec Abs_mes_count_n_-2	1
(100,110]	exterior	E	Dec Abs_mes_count_n_-2	1
(10,20]	interior	F	Dec Abs_mes_count_n_-2	19
(10,20]	interior	F	Dec Abs_mes_count_n_-2	14
(10,20]	interior	F	Dec Abs_mes_count_n_-2	19
(10,20]	interior	F	Dec Abs_mes_count_n_-2	13
(10,20]	interior	F	Dec Abs_mes_count_n_-2	13
(10,20]	interior	F	Dec Abs_mes_count_n_-2	13
(10,20]	interior	F	Dec Abs_mes_count_n_-2	11
(10,20]	interior	F	Dec Abs_mes_count_n_-2	17
(10,20]	interior	F	Dec Abs_mes_count_n_-2	8
(10,20]	interior	F	Dec Abs_mes_count_n_-2	11
(10,20]	interior	F	Dec Abs_mes_count_n_-2	6
(10,20]	interior	F	Dec Abs_mes_count_n_-2	12
(10,20]	interior	F	Dec Abs_mes_count_n_-2	19
(10,20]	interior	F	Dec Abs_mes_count_n_-2	7
(10,20]	interior	F	Dec Abs_mes_count_n_-2	13
(10,20]	interior	F	Dec Abs_mes_count_n_-2	9
(20,30]	interior	F	Dec Abs_mes_count_n_-2	11
(20,30]	interior	F	Dec Abs_mes_count_n_-2	9
(20,30]	interior	F	Dec Abs_mes_count_n_-2	5
(20,30]	interior	F	Dec Abs_mes_count_n_-2	16
(20,30]	interior	F	Dec Abs_mes_count_n_-2	13
(20,30]	interior	F	Dec Abs_mes_count_n_-2	14
(20,30]	interior	F	Dec Abs_mes_count_n_-2	13
(20,30]	interior	F	Dec Abs_mes_count_n_-2	11
(20,30]	interior	F	Dec Abs_mes_count_n_-2	8
(20,30]	interior	F	Dec Abs_mes_count_n_-2	13
(20,30]	interior	F	Dec Abs_mes_count_n_-2	12
(20,30]	interior	F	Dec Abs_mes_count_n_-2	13
(20,30]	interior	F	Dec Abs_mes_count_n_-2	11
(20,30]	interior	F	Dec Abs_mes_count_n_-2	6
(20,30]	interior	F	Dec Abs_mes_count_n_-2	11
(20,30]	interior	F	Dec Abs_mes_count_n_-2	18
(40,50]	interior	F	Dec Abs_mes_count_n_-2	9
(40,50]	interior	F	Dec Abs_mes_count_n_-2	6
(40,50]	interior	F	Dec Abs_mes_count_n_-2	13
(40,50]	interior	F	Dec Abs_mes_count_n_-2	13
(40,50]	interior	F	Dec Abs_mes_count_n_-2	3
(40,50]	interior	F	Dec Abs_mes_count_n_-2	8
(40,50]	interior	F	Dec Abs_mes_count_n_-2	8
(40,50]	interior	F	Dec Abs_mes_count_n_-2	9
(40,50]	interior	F	Dec Abs_mes_count_n_-2	11
(40,50]	interior	F	Dec Abs_mes_count_n_-2	10
(40,50]	interior	F	Dec Abs_mes_count_n_-2	10
(40,50]	interior	F	Dec Abs_mes_count_n_-2	11
(40,50]	interior	F	Dec Abs_mes_count_n_-2	8
(40,50]	interior	F	Dec Abs_mes_count_n_-2	14
(40,50]	interior	F	Dec Abs_mes_count_n_-2	5
(40,50]	interior	F	Dec Abs_mes_count_n_-2	10
(50,60]	interior	F	Dec Abs_mes_count_n_-2	7
(50,60]	interior	F	Dec Abs_mes_count_n_-2	16
(50,60]	interior	F	Dec Abs_mes_count_n_-2	7
(50,60]	interior	F	Dec Abs_mes_count_n_-2	4
(50,60]	interior	F	Dec Abs_mes_count_n_-2	9
(50,60]	interior	F	Dec Abs_mes_count_n_-2	5
(50,60]	interior	F	Dec Abs_mes_count_n_-2	4
(50,60]	interior	F	Dec Abs_mes_count_n_-2	10
(50,60]	interior	F	Dec Abs_mes_count_n_-2	10
(50,60]	interior	F	Dec Abs_mes_count_n_-2	9
(50,60]	interior	F	Dec Abs_mes_count_n_-2	6
(50,60]	interior	F	Dec Abs_mes_count_n_-2	4
(50,60]	interior	F	Dec Abs_mes_count_n_-2	11
(50,60]	interior	F	Dec Abs_mes_count_n_-2	6
(50,60]	interior	F	Dec Abs_mes_count_n_-2	5
(50,60]	interior	F	Dec Abs_mes_count_n_-2	8
(60,70]	interior	F	Dec Abs_mes_count_n_-2	4
(60,70]	interior	F	Dec Abs_mes_count_n_-2	6
(60,70]	interior	F	Dec Abs_mes_count_n_-2	6
(60,70]	interior	F	Dec Abs_mes_count_n_-2	4
(60,70]	interior	F	Dec Abs_mes_count_n_-2	7
(60,70]	interior	F	Dec Abs_mes_count_n_-2	4
(60,70]	interior	F	Dec Abs_mes_count_n_-2	3
(60,70]	interior	F	Dec Abs_mes_count_n_-2	3
(60,70]	interior	F	Dec Abs_mes_count_n_-2	6
(60,70]	interior	F	Dec Abs_mes_count_n_-2	5
(60,70]	interior	F	Dec Abs_mes_count_n_-2	5
(60,70]	interior	F	Dec Abs_mes_count_n_-2	5
(60,70]	interior	F	Dec Abs_mes_count_n_-2	1
(60,70]	interior	F	Dec Abs_mes_count_n_-2	7
(60,70]	interior	F	Dec Abs_mes_count_n_-2	5
(80,90]	interior	F	Dec Abs_mes_count_n_-2	1
(80,90]	interior	F	Dec Abs_mes_count_n_-2	2
(80,90]	interior	F	Dec Abs_mes_count_n_-2	1
(80,90]	interior	F	Dec Abs_mes_count_n_-2	1
(80,90]	interior	F	Dec Abs_mes_count_n_-2	1
(80,90]	interior	F	Dec Abs_mes_count_n_-2	1
(80,90]	interior	F	Dec Abs_mes_count_n_-2	1
(80,90]	interior	F	Dec Abs_mes_count_n_-2	2
(80,90]	interior	F	Dec Abs_mes_count_n_-2	1
(80,90]	interior	F	Dec Abs_mes_count_n_-2	2
(90,100]	interior	F	Dec Abs_mes_count_n_-2	2
(90,100]	interior	F	Dec Abs_mes_count_n_-2	1
(90,100]	interior	F	Dec Abs_mes_count_n_-2	1
(90,100]	interior	F	Dec Abs_mes_count_n_-2	1
(90,100]	interior	F	Dec Abs_mes_count_n_-2	1
(100,110]	interior	F	Dec Abs_mes_count_n_-2	1
(10,20]	exterior	G	Dec Abs_mes_count_n_-2	27
(10,20]	exterior	G	Dec Abs_mes_count_n_-2	21
(10,20]	exterior	G	Dec Abs_mes_count_n_-2	13
(10,20]	exterior	G	Dec Abs_mes_count_n_-2	20
(10,20]	exterior	G	Dec Abs_mes_count_n_-2	12
(10,20]	exterior	G	Dec Abs_mes_count_n_-2	18
(10,20]	exterior	G	Dec Abs_mes_count_n_-2	15
(10,20]	exterior	G	Dec Abs_mes_count_n_-2	17
(10,20]	exterior	G	Dec Abs_mes_count_n_-2	14
(10,20]	exterior	G	Dec Abs_mes_count_n_-2	13
(10,20]	exterior	G	Dec Abs_mes_count_n_-2	14
(10,20]	exterior	G	Dec Abs_mes_count_n_-2	14
(10,20]	exterior	G	Dec Abs_mes_count_n_-2	9
(10,20]	exterior	G	Dec Abs_mes_count_n_-2	16
(10,20]	exterior	G	Dec Abs_mes_count_n_-2	16
(10,20]	exterior	G	Dec Abs_mes_count_n_-2	11
(10,20]	exterior	G	Dec Abs_mes_count_n_-2	16
(10,20]	exterior	G	Dec Abs_mes_count_n_-2	14
(30,40]	exterior	G	Dec Abs_mes_count_n_-2	16
(30,40]	exterior	G	Dec Abs_mes_count_n_-2	19
(30,40]	exterior	G	Dec Abs_mes_count_n_-2	14
(30,40]	exterior	G	Dec Abs_mes_count_n_-2	8
(30,40]	exterior	G	Dec Abs_mes_count_n_-2	11
(30,40]	exterior	G	Dec Abs_mes_count_n_-2	11
(30,40]	exterior	G	Dec Abs_mes_count_n_-2	14
(30,40]	exterior	G	Dec Abs_mes_count_n_-2	6
(30,40]	exterior	G	Dec Abs_mes_count_n_-2	11
(30,40]	exterior	G	Dec Abs_mes_count_n_-2	17
(30,40]	exterior	G	Dec Abs_mes_count_n_-2	8
(30,40]	exterior	G	Dec Abs_mes_count_n_-2	9
(30,40]	exterior	G	Dec Abs_mes_count_n_-2	18
(30,40]	exterior	G	Dec Abs_mes_count_n_-2	21
(30,40]	exterior	G	Dec Abs_mes_count_n_-2	15
(30,40]	exterior	G	Dec Abs_mes_count_n_-2	16
(30,40]	exterior	G	Dec Abs_mes_count_n_-2	19
(30,40]	exterior	G	Dec Abs_mes_count_n_-2	10
(40,50]	exterior	G	Dec Abs_mes_count_n_-2	4
(40,50]	exterior	G	Dec Abs_mes_count_n_-2	10
(40,50]	exterior	G	Dec Abs_mes_count_n_-2	8
(40,50]	exterior	G	Dec Abs_mes_count_n_-2	15
(40,50]	exterior	G	Dec Abs_mes_count_n_-2	9
(40,50]	exterior	G	Dec Abs_mes_count_n_-2	9
(40,50]	exterior	G	Dec Abs_mes_count_n_-2	13
(40,50]	exterior	G	Dec Abs_mes_count_n_-2	9
(40,50]	exterior	G	Dec Abs_mes_count_n_-2	10
(40,50]	exterior	G	Dec Abs_mes_count_n_-2	13
(40,50]	exterior	G	Dec Abs_mes_count_n_-2	11
(40,50]	exterior	G	Dec Abs_mes_count_n_-2	9
(40,50]	exterior	G	Dec Abs_mes_count_n_-2	6
(40,50]	exterior	G	Dec Abs_mes_count_n_-2	9
(40,50]	exterior	G	Dec Abs_mes_count_n_-2	7
(40,50]	exterior	G	Dec Abs_mes_count_n_-2	9
(40,50]	exterior	G	Dec Abs_mes_count_n_-2	12
(40,50]	exterior	G	Dec Abs_mes_count_n_-2	10
(60,70]	exterior	G	Dec Abs_mes_count_n_-2	5
(60,70]	exterior	G	Dec Abs_mes_count_n_-2	8
(60,70]	exterior	G	Dec Abs_mes_count_n_-2	10
(60,70]	exterior	G	Dec Abs_mes_count_n_-2	5
(60,70]	exterior	G	Dec Abs_mes_count_n_-2	7
(60,70]	exterior	G	Dec Abs_mes_count_n_-2	4
(60,70]	exterior	G	Dec Abs_mes_count_n_-2	3
(60,70]	exterior	G	Dec Abs_mes_count_n_-2	4
(60,70]	exterior	G	Dec Abs_mes_count_n_-2	1
(60,70]	exterior	G	Dec Abs_mes_count_n_-2	3
(60,70]	exterior	G	Dec Abs_mes_count_n_-2	3
(60,70]	exterior	G	Dec Abs_mes_count_n_-2	8
(60,70]	exterior	G	Dec Abs_mes_count_n_-2	5
(60,70]	exterior	G	Dec Abs_mes_count_n_-2	7
(60,70]	exterior	G	Dec Abs_mes_count_n_-2	9
(60,70]	exterior	G	Dec Abs_mes_count_n_-2	7
(60,70]	exterior	G	Dec Abs_mes_count_n_-2	5
(60,70]	exterior	G	Dec Abs_mes_count_n_-2	9
(80,90]	exterior	G	Dec Abs_mes_count_n_-2	1
(80,90]	exterior	G	Dec Abs_mes_count_n_-2	1
(80,90]	exterior	G	Dec Abs_mes_count_n_-2	2
(80,90]	exterior	G	Dec Abs_mes_count_n_-2	2
(80,90]	exterior	G	Dec Abs_mes_count_n_-2	3
(80,90]	exterior	G	Dec Abs_mes_count_n_-2	4
(80,90]	exterior	G	Dec Abs_mes_count_n_-2	3
(80,90]	exterior	G	Dec Abs_mes_count_n_-2	2
(80,90]	exterior	G	Dec Abs_mes_count_n_-2	1
(80,90]	exterior	G	Dec Abs_mes_count_n_-2	1
(80,90]	exterior	G	Dec Abs_mes_count_n_-2	1
(80,90]	exterior	G	Dec Abs_mes_count_n_-2	1
(80,90]	exterior	G	Dec Abs_mes_count_n_-2	1
[truncated: 9,677 more rows]
